# Supplementary material
Source: PubMed Central journal article supplement (PMC7039281)
Supplement: NIHMS1555507-supplement-Supplementary_Information.pdf [file NIHMS1555507-supplement-Supplementary_Information.pdf]

1 **Supplementary Information**

2

3 **Genome editing retraces the evolution of toxin resistance in the monarch butterfly**

4 Karageorgi, M., Groen, S. C., Sumbul, F., Pelaez, J. N., Verster, K. I., Aguilar, J. M., Hastings,

5 A. P., Bernstein, S. L., Matsunaga, T., Astourian, M., Guerra, G., Rico, F., Dobler, S., Agrawal,

6 A. A. & Whiteman, N. K.

7

8 **Contents**

|    |                                            |            |
|----|--------------------------------------------|------------|
| 9  | Supplementary Text                         | Page 2-5   |
| 10 | Additional References Supplementary Text   | Page 6     |
| 11 | Supplementary Table 1                      | Page 7-8   |
| 12 | Supplementary Table 2                      | Page 9-13  |
| 13 | Supplementary Table 3                      | Page 14    |
| 14 | Supplementary Table 4                      | Page 15    |
| 15 | Supplementary Table 5                      | Page 16    |
| 16 | Supplementary Table 6                      | Page 17-19 |
| 17 | Supplementary Table 7                      | Page 20    |
| 18 | Supplementary Table 7                      | Page 21    |
| 19 | Additional References Supplementary Tables | Page 22-29 |

24 **Supplementary Text**

25

26 **Ancestral sequence reconstruction of coevolving sites in ATP $\alpha$ , and associations with**  
27 **feeding/sequestration**

28

29 Insect supertree reconstruction

30 To study the evolution of organismal traits and of ATP $\alpha$  sites associated with  
31 specialization on cardiac glycoside-containing plants, we first estimated a phylogeny of insect  
32 species adapted to feeding on plants that produce cardenolides and/or bufadienolides<sup>6</sup>, the non-  
33 adapted close relatives of these insects, and two vertebrate outgroups, *Sus scrofa* and *Squalus*  
34 *acanthias*. Phylogenetic relationships between all surveyed species were obtained from previous  
35 studies (see **Suppl. Table 1** for references) using a supertree approach. These phylogenetic  
36 studies used overlapping but non-identical molecular markers, and thus, branch lengths were  
37 estimated on this fixed species topology. We used the full-length coding sequences of ATP $\alpha$ , and  
38 the *COI* gene that codes for the mitochondrial cytochrome *c* oxidase subunit 1 and is widely used  
39 in phylogenetic studies, which were available for most species (see **Suppl. Table 2** for ID  
40 numbers). The data was implemented in the IQ-TREE web server version 1.6.6<sup>31</sup>, in which all  
41 settings were left to default, with the exception of using the FreeRate heterogeneity model<sup>55,56</sup>.  
42 The output tree was used for all subsequent analyses. We obtained ATP $\alpha$  sequences and  
43 information on the level of specialization on cardiac glycoside-producing host plants, including  
44 presence/absence of feeding on plants producing cardiac glycosides and presence/absence of  
45 cardiac glycoside sequestration from the literature (no new data was collected, see **Suppl. Table**  
46 **3** for references)<sup>7-11,28,57-60</sup>. Even though the aphid *Myzus persicae* has been reported to

47 (passively) sequester cardiac glycosides, this species has a wide host range and is not a specialist  
48 on cardiac glycoside-producing host plants like the aphid *Aphis nerii*<sup>60</sup>. Therefore, we decided  
49 not to categorize *M. persicae* with insects that are specialized on cardiac glycoside-producing  
50 host plants for ASR (see below).

51         Based on the literature cited, we assumed that amino acid substitutions in the H1-H2  
52 extracellular loop of ATP $\alpha$  are fixed substitutions in the included species. Data for multiple  
53 individuals per species were only available for some of the *Danaus* and *Drosophila* species, and  
54 polymorphic non-synonymous substitutions were only detected in *D. subobscura*<sup>27</sup>. Because  
55 some studies did not include closely related non-cardiac glycoside-specialized species, additional  
56 sequences from close relatives were downloaded from PDB, GenBank, LepBase, and InsectBase  
57 for the Coleoptera, Diptera and Lepidoptera, when sequences of ATP $\alpha$  were available. These  
58 sequences included those from additional species of Diptera to reconstruct the evolution of  
59 resistance in this group<sup>7,27,59</sup>. Additional Coleoptera and Lepidoptera species were included to  
60 reconstruct the four separate instances of the evolution of cardiac-glycoside resistance in each  
61 order<sup>9,10,57,58</sup>. A complete list of sequences included, along with their source databases, ID  
62 numbers, and references, can be found in **Suppl. Table 2**.

63

64 Associations between sequence evolution of ATP $\alpha$  residues and feeding on cardiac glycoside-  
65 producing plants and toxin sequestration

66         We focused our analyses on the first extracellular loop (H1-H2 domain) of ATP $\alpha$ , and,  
67 using TraitRateProp<sup>37</sup>, identified residues whose rate of amino acid sequence evolution was  
68 associated with changes in character states for feeding on cardiac glycoside-producing plants.  
69 The joint likelihood framework of TraitRateProp tests the hypothesis of an association between a

70 trait and the evolutionary rate of a sequence, and where an association is found, it computes the  
71 site-specific Bayes factor between the rate of sequence evolution at each site and the trait. This  
72 analysis required an ultrametric rooted tree, a multi-sequence alignment, and trait data. The  
73 ultrametric tree was constructed using the `makeChronosCalib` function in the `ape` package in R<sup>33</sup>,  
74 using a calibration range of 346-401 MYA for the origin of Hemiptera + Thysanoptera, given by  
75 the confidence interval estimated from Misof *et al.*<sup>61</sup>. Trait data can be found in **Suppl. Table 3**.

76

### 77 Epistasis/co-evolution of ATP $\alpha$ amino acid sites

78 To detect candidate intramolecular epistatic interactions or co-evolution between amino  
79 acid sites within the H1-H2 loop of ATP $\alpha$  that might constrain or enable the evolution of TSI to  
80 cardiac glycosides, we used the Spidermonkey/Bayesian graphical model (BGM) method in  
81 HyPhy version 2.3.14<sup>35,38</sup>. We used the default substitution models (HKY85 nucleotide and  
82 Muse-Gaut codon substitution models) and assumed a maximum of two parents per node. The  
83 MCMC chain was run for 100,000 iterations, with 10,000 burn-in, and sampled every 1,000  
84 iterations. Sites in this analysis were filtered based on a minimum number of five substitutions  
85 across the phylogeny. Interactions between sites with a marginal posterior probability (PP) > 0.5  
86 were considered statistically significant. For the full results of this analysis, see **Extended Data**  
87 **Fig. 1**.

88

### 89 ASR of amino acid sequence and feeding/sequestering states

90 ASR of amino acid sequences of the H1-H2 extracellular loop of ATP $\alpha$  was performed  
91 using joint maximum likelihood methods implemented in HyPhy version 2.3.14<sup>34,35</sup>. A custom  
92 code to execute this analysis was generously provided by Art Poon and is available<sup>38</sup>. ASR of

93 cardiac glycoside feeding and sequestration was performed using the ace function of the ape  
94 package in R<sup>33</sup>, with feeding and sequestering considered as one ordinal trait. Three models for  
95 discrete character evolution were considered (equal rates, symmetric, and all rates different).  
96 Statistical significance between likelihoods for each model was tested using a chi-square test.  
97 The amino acid sites identified as coevolving and significantly associated with feeding and  
98 sequestering were 111, 119, and 122. The number of substitutions at these three sites that  
99 occurred across each branch based on the ASR of the H1-H2 loop was then mapped onto the  
100 insect tree, along with ancestral states of feeding and sequestering, and visualized using the  
101 Interactive Tree Of Life (iTOL)<sup>36</sup>.

102 **Additional References for Supplementary Text**

103

104 55. Soubrier, J., Steel, M., Lee, M. S., Der Sarkissian, C., Guindon, S., Ho, S. Y. & Cooper, A.  
105 The influence of rate heterogeneity among sites on the time dependence of molecular rates. *Mol.*  
106 *Biol. Evol.* **29**, 3345-3358 (2012).

107 56. Yang, Z. A space-time process model for the evolution of DNA sequences. *Genetics* **139**,  
108 993-1005 (1995).

109 57. Dobler, S., Petschenka, G., Wagschal, V. & Flacht, L. Convergent adaptive evolution – how  
110 insects master the challenge of cardiac glycoside-containing host plants. *Entomol. Exp. Appl.*  
111 **157**, 30-39 (2015).

112 58. Labeyrie, E. & Dobler, S. Molecular adaptation of *Chrysochus* leaf beetles to toxic  
113 compounds in their food plants. *Mol. Biol. Evol.* **21**, 218-221 (2004).

114 59. Schneider, M., Wunder, C., Reuss, E., Toennes, S. W. & Mebs, D. Evading plant defence:  
115 infestation of poisonous milkweed fruits (Asclepiadaceae) by the fruit fly *Dacus siliqualactis*  
116 (Diptera: Tephritidae). *Toxicon* **139**, 13-19 (2017).

117 60. Züst, T. & Agrawal, A. A. Population growth and sequestration of plant toxins along a  
118 gradient of specialization in four aphid species on the common milkweed *Asclepias syriaca*.  
119 *Func. Ecol.* **30**, 547-556 (2016).

120 61. Misof, B., *et al.* Phylogenomics resolves the timing and pattern of insect evolution. *Science*  
121 **346**, 763-767 (2014).

122

123

124

125 **Supplementary Tables 1 – 8**

126 **Supplementary Table 1.** Phylogenetic relationships used in reconstruction of the insect  
 127 supertree.  
 128

| Clade                             | References for insect species phylogeny reconstruction |
|-----------------------------------|--------------------------------------------------------|
| <b>Pterygota (winged insects)</b> | Misof, Science, 2014                                   |
|                                   | Rainford, PLoS ONE, 2014                               |
|                                   | Wiens, Nat Commun, 2015                                |
| <b>Hemiptera</b>                  | Bramer, Proc R Soc B, 2015                             |
|                                   | Dobler, PNAS, 2012                                     |
|                                   | Li, Sci Rep, 2015                                      |
|                                   | Rainford, PLoS ONE, 2014                               |
|                                   | Thorpe, BMC Genomics, 2016                             |
|                                   | Wiens, Nat Commun, 2015                                |
|                                   | Zhen, Science, 2012                                    |
| <b>Hymenoptera</b>                | Boevé, BMC Evol Biol, 2013                             |
|                                   | Dobler, PNAS, 2012                                     |
|                                   | Dobler, Entomol Exp et Appl, 2015                      |
|                                   | Peters, Curr Biol, 2017                                |
|                                   | Rainford, PLoS ONE, 2014                               |
|                                   | Wiens, Nat Commun, 2015                                |
| <b>Coleoptera</b>                 | Dobler, PNAS, 2012                                     |
|                                   | Gómez-Zurita, PLoS ONE, 2007                           |
|                                   | Hunt, Science, 2007                                    |
|                                   | Labeyrie and Dobler, Mol Biol Evol, 2004               |
|                                   | McKenna, Syst Entomol, 2015                            |
|                                   | Wiens, Nat Commun, 2015                                |
|                                   | Zhen, Science, 2012                                    |
| <b>Lepidoptera</b>                | Aardema, Evolution, 2016                               |
|                                   | DaCosta, Ann ESA, 2006                                 |
|                                   | Espeland, Curr Biol, 2018                              |
|                                   | Heikkilä, Proc R Soc B, 2012                           |
|                                   | Kawahara, Proc R Soc B, 2014                           |
|                                   | Kunte, Evolution, 2009                                 |
|                                   | Mitchell, Syst Entomol, 2006                           |
|                                   | Petschenka, Evolution, 2013                            |
|                                   | Wiens, Nat Commun, 2015                                |
|                                   | Zahiri, Zool Scripta, 2011                             |
| Zaspel, PLoS ONE, 2014            |                                                        |
| <b>Diptera</b>                    | Pegueroles, Sci Rep, 2016                              |
|                                   | Petschenka, Am Nat, 2017                               |

|  |                                     |
|--|-------------------------------------|
|  | San Jose, Mol Phylogenet Evol, 2017 |
|  | Seetharam, PeerJ, 2013              |
|  | Schneider, Toxicon, 2017            |
|  | Virgilio, Mol Phylogenet Evol, 2015 |
|  | Wiegmann, PNAS, 2011                |
|  | Wiens, Nat Commun, 2015             |

129

130

131

132

133

134

135

136

137

138

139

140

141

142

143

144

145

146

147

148

149

150

151



152 **Supplementary Table 2.** List of *ATP $\alpha$*  and *COI* sequences used for molecular evolution  
 153 analyses (when multiple paralogs are present the copies used in the phylogeny are highlighted in  
 154 yellow).  
 155

| Clade       | Species                                                     | <i>ATP<math>\alpha</math></i> Copy | <i>ATP<math>\alpha</math></i> Source | <i>ATP<math>\alpha</math></i> ID Number | Reference                                                | <i>COI</i> ID Number from GenBank                 |
|-------------|-------------------------------------------------------------|------------------------------------|--------------------------------------|-----------------------------------------|----------------------------------------------------------|---------------------------------------------------|
| Vertebrata  | <i>Sus scrofa</i>                                           | 1A1                                | PDB                                  | 3N23_A                                  | Yatime et al, J Struct Biol, 2011                        | KT372092.1                                        |
|             | <i>Squalus acanthias</i>                                    | 1A1                                | PDB                                  | 3A3Y_A                                  | Ogawa et al, PNAS, 2009                                  | KP192399.1                                        |
| Hemiptera   | <i>Oncopeltus fasciatus</i>                                 | 1C                                 | GenBank                              | JQ771518.1                              | Zhen et al, Science, 2012                                | KR565226.1                                        |
|             | <i>Oncopeltus fasciatus</i>                                 | 1B                                 | GenBank                              | JQ771519.1                              | Zhen et al, Science, 2012                                | KR565226.1                                        |
|             | <i>Oncopeltus fasciatus</i>                                 | 1A                                 | GenBank                              | JQ771520.1                              | Zhen et al, Science, 2012                                | KR565226.1                                        |
|             | <i>Lygaeus kalmii</i>                                       | 1C                                 | GenBank                              | JQ771515.1                              | Zhen et al, Science, 2012                                | KR581102.1                                        |
|             | <i>Lygaeus kalmii</i>                                       | 1B                                 | GenBank                              | JQ771514.1                              | Zhen et al, Science, 2012                                | KR581102.1                                        |
|             | <i>Lygaeus kalmii</i>                                       | 1A                                 | GenBank                              | JQ771513.1                              | Zhen et al, Science, 2012                                | KR581102.1                                        |
|             | <i>Largus</i> sp.                                           | 1                                  | GenBank                              | HE956738.1                              | Dobler et al, PNAS, 2012                                 | Not available                                     |
|             | <i>Pyrrhocoris apterus</i>                                  | 1                                  | GenBank                              | HE956739.1                              | Dobler et al, PNAS, 2012                                 | KM023058.1                                        |
|             | <i>Halyomorpha halys</i>                                    | 1                                  | GenBank                              | XM_014416433.2                          | i5K Consortium, J Hered, 2013                            | KR070751.1                                        |
|             | <i>Boisea trivittata</i> /<br><i>Leptocoris trivittatus</i> | 1                                  | GenBank                              | JQ771499.1                              | Zhen et al, Science, 2012                                | KR035416.1                                        |
|             | <i>Cimex lectularius</i>                                    | 1                                  | GenBank                              | XM_014394882.2                          | i5K Consortium, J Hered, 2013                            | KR044731.1                                        |
|             | <i>Nilaparvata lugens</i>                                   | 1                                  | GenBank                              | XM_022328639.1                          | Xue, Genome Biol, 2014                                   | JN391181.1                                        |
|             | <i>Aphis nerii</i>                                          | 1                                  | GenBank                              | JQ771496.1                              | Zhen et al, Science, 2012                                | KR581182.1                                        |
|             | <i>Acyrtosiphon pisum</i>                                   | 1                                  | GenBank                              | XM_016802834.1                          | International Aphid Genomics Consortium, PLoS Biol, 2010 | AB506719.1                                        |
|             | <i>Myzus persicae</i>                                       | 1                                  | GenBank                              | XM_022311823.1                          | Mathers, Genome Biol, 2017                               | KR575138.1                                        |
|             | <i>Bemisia tabaci</i>                                       | 1                                  | GenBank                              | XM_019041062.1                          | Chen, BMC Biol, 2016                                     | LN614545.1                                        |
| Psocoda     | <i>Pediculus humanus</i>                                    | 1                                  | GenBank                              | XM_002427669.1                          | Kirkness, PNAS, 2010                                     | AY695985.1                                        |
| Hymenoptera | <i>Apis mellifera</i>                                       | 1                                  | GenBank                              | XM_006564160.2                          | Honeybee Genome Sequencing Consortium, Nature, 2006      | KX051673.1                                        |
|             | <i>Camponotus floridanus</i>                                | 1                                  | GenBank                              | XM_011260609.3                          | Bonasio, Science, 2010                                   | AY334397.1                                        |
|             | <i>Cephus cinctus</i>                                       | 1                                  | GenBank                              | XM_015729628.2                          | i5K Consortium, J Hered, 2013                            | KR879345.1                                        |
|             | <i>Monophadnus latus</i>                                    | 1                                  | GenBank                              | LN736262.1                              | Dobler, Entomol Exp Appl, 2015                           | Not available                                     |
|             | <i>Pachyprotasis variegata</i>                              | 1                                  | GenBank                              | LN736263.1                              | Dobler, Entomol Exp Appl, 2015                           | LN736268.1                                        |
|             | <i>Pachyprotasis rapae</i>                                  | 1                                  | GenBank                              | LN736264.1                              | Dobler, Entomol Exp Appl, 2015                           | LN736267.1                                        |
| Coleoptera  | <i>Rhyssomatus lineaticollis</i>                            | 1A                                 | GenBank                              | JQ771524.1                              | Zhen et al, Science, 2012                                | Not available                                     |
|             | <i>Rhyssomatus lineaticollis</i>                            | 1B                                 | GenBank                              | JQ771523.1                              | Zhen et al, Science, 2012                                | Not available                                     |
|             | <i>Dendroctonus ponderosae</i>                              | 1                                  | GenBank                              | XM_019913697.1                          | Keeling, Genome Biol, 2013                               | JQ308436.1                                        |
|             | <i>Cyrtopomistus castaneus</i>                              | 1                                  | GenBank                              | JQ771502.1                              | Zhen et al, Science, 2012                                | Not available, but also not in original phylogeny |
|             | <i>Tetraopes tetraphthalmus</i>                             | 1                                  | GenBank                              | JQ771526.1                              | Zhen et al, Science, 2012                                | KR485899.1                                        |
|             | <i>Anoplophora glabripennis</i>                             | 1                                  | GenBank                              | XM_018706533.2                          | McKenna, Genome Biol, 2016                               | AB439154.1                                        |

|             |                                  |    |         |                                                                     |                                          |                                             |
|-------------|----------------------------------|----|---------|---------------------------------------------------------------------|------------------------------------------|---------------------------------------------|
|             | <i>Megacyllene robiniae</i>      | 1  | GenBank | JQ771517.1                                                          | Zhen et al, Science, 2012                | KU255678.1                                  |
|             | <i>Alticinae</i> sp.             | 1  | GenBank | HE956742.1                                                          | Dobler et al, PNAS, 2012                 | Not available for this submitted individual |
|             | <i>Labidomera clivicollis</i>    | 1  | GenBank | JQ771511.1                                                          | Zhen et al, Science, 2012                | KR486314.1                                  |
|             | <i>Leptinotarsa decemlineata</i> | 1  | GenBank | XM_023161024.1                                                      | Schoville, Sci Rep, 2018                 | AY165708.1                                  |
|             | <i>Gastrophysa viridula</i>      | 1  | GenBank | HE956744.1                                                          | Dobler et al, PNAS, 2012                 | MH323135.1                                  |
|             | <i>Plagioderia versicolora</i>   | 1  | GenBank | JQ771522.1                                                          | Zhen et al, Science, 2012                | KM448255.1                                  |
|             | <i>Chrysochus auratus</i>        | 1B | GenBank | JQ771501.1                                                          | Zhen et al, Science, 2012                | AY165728.1                                  |
|             | <i>Chrysochus auratus</i>        | 1A | GenBank | JQ771500.1                                                          | Zhen et al, Science, 2012                | AY165728.1                                  |
|             | <i>Chrysochus cobaltinus</i>     | 1B | GenBank | AJ549438.1                                                          | Labeyrie and Dobler, Mol Biol Evol, 2004 | Not available                               |
|             | <i>Chrysochus asclepiadeus</i>   | 1  | GenBank | HE956740.1                                                          | Dobler et al, PNAS, 2012                 | KP306805.1                                  |
|             | <i>Chrysochus chinensis</i>      | 1  | GenBank | AJ617744.1                                                          | Labeyrie and Dobler, Mol Biol Evol, 2004 | KU188478.1                                  |
|             | <i>Platycorynus sauteri</i>      | 1  | GenBank | AJ617746.1                                                          | Labeyrie and Dobler, Mol Biol Evol, 2004 | Not available                               |
|             | <i>Aethina tumida</i>            | 1  | GenBank | XM_020018205.1                                                      | i5K Consortium, J Hered, 2013            | KC966652.1                                  |
|             | <i>Tenebrio molitor</i>          | 1  | GenBank | KY921817.1                                                          | Moreira, J Insect Physiol, 2017          | KR915361.1                                  |
|             | <i>Agrilus planipennis</i>       | 1  | GenBank | XM_018472182.1                                                      | i5K Consortium, J Hered, 2013            | KT250504.1                                  |
| Lepidoptera | <i>Plutella xylostella</i>       | 1  | GenBank | XM_011549930.1                                                      | You, Nat Genet, 2013                     | KM588487.1                                  |
|             | <i>Papilio glaucus</i>           | 1  | GenBank | JQ771498.1                                                          | Zhen et al, Science, 2012                | GU089129.1                                  |
|             | <i>Papilio xuthus</i>            | 1  | GenBank | XM_013315255.1                                                      | Nishikawa Nat Genet, 2015                | EU105383.1                                  |
|             | <i>Papilio machaon</i>           | 1  | GenBank | XM_014516575.1                                                      | Li, Nat Commun, 2015                     | MH420066.1                                  |
|             | <i>Papilio polytes</i>           | 1  | GenBank | XM_013283743.1                                                      | Nishikawa Nat Genet, 2015                | KC158441.1                                  |
|             | <i>Lerema accius</i>             | 1  | LepBase | lerema_accius_v1x1_core_32_85_1_pr<br>oteins_lac1010.8.m<br>RNA     | Cong, BMC Genomics, 2015                 | GU089979.1                                  |
|             | <i>Pieris rapae</i>              | 1  | GenBank | XM_022259192.1                                                      | Shen, F1000Res, 2016                     | EU105237.1                                  |
|             | <i>Pieris napi</i>               | 1  | LepBase | pieris_napi_pnv1x1_core_32_85_1_pr<br>oteins_PIENAPT00<br>000006454 | Meslin, PNAS, 2017                       | GU013649.1                                  |
|             | <i>Phoebis sennae</i>            | 1  | LepBase | phoebis_sennae_v1x1_core_32_85_1_p<br>rotein_pse2358.15             | Cong, Genome Biol Evol, 2016             | MF547337.1                                  |
|             | <i>Calycopis cecrops</i>         | 1  | LepBase | calycopis_cecrops_v1x1_core_32_85_1_p<br>rotein_cce3094.7.mRNA      | Cong, Sci Rep, 2016                      | GU089704.1                                  |
|             | <i>Mechanitis polymnia</i>       | 1  | GenBank | HF945460.1                                                          | Petschenka, Evolution, 2013              | EU068852.1                                  |
|             | <i>Lycorea halia</i>             | 1  | GenBank | JQ771512.1                                                          | Zhen et al, Science, 2012                | GQ864788.1                                  |
|             | <i>Idea leuconoe</i>             | 1  | GenBank | HF945457.1                                                          | Petschenka, Evolution, 2013              | GQ864778.1                                  |
|             | <i>Euploea phaenareta</i>        | 1  | GenBank | HF945456.1                                                          | Petschenka, Evolution, 2013              | Not available                               |
|             | <i>Euploea mulciber</i>          | 1  | GenBank | HF945466.1                                                          | Petschenka, Evolution, 2013              | MF804644.1                                  |
|             | <i>Euploea core</i>              | 1  | GenBank | HF945455.1                                                          | Petschenka, Evolution, 2013              | GU012616.1                                  |
|             | <i>Amauris tartarea</i>          | 1  | GenBank | HF945450.1                                                          | Petschenka, Evolution, 2013              | DQ071867.1                                  |
|             | <i>Ideopsis juvena</i>           | 1  | GenBank | HF945458.1                                                          | Petschenka, Evolution, 2013              | KP007720.1                                  |
|             | <i>Parantica aglea</i>           | 1  | GenBank | HF945461.1                                                          | Petschenka, Evolution, 2013              | GU012559.1                                  |
|             | <i>Tirumala petiverana</i>       | 1  | GenBank | HF945463.1                                                          | Petschenka, Evolution, 2013              | Not available                               |

|  |                                       |   |            |                                                                                            |                                            |               |
|--|---------------------------------------|---|------------|--------------------------------------------------------------------------------------------|--------------------------------------------|---------------|
|  | <i>Tirumala septentrionis</i>         | 1 | GenBank    | HF945464.1                                                                                 | Petschenka, Evolution, 2013                | KU183736.1    |
|  | <i>Tirumala limniace</i>              | 1 | GenBank    | HF945462.1                                                                                 | Petschenka, Evolution, 2013                | HQ990432.1    |
|  | <i>Danaus chrysippus</i>              | 1 | GenBank    | LN880853.1                                                                                 | Pierce, Biol J Linn Soc, 2016              | HQ990426.1    |
|  | <i>Danaus gilippus</i>                | 1 | GenBank    | JQ771506.1                                                                                 | Zhen et al, Science, 2012                  | MF547087.1    |
|  | <i>Danaus genutia</i>                 | 1 | GenBank    | HF945453.1                                                                                 | Petschenka, Evolution, 2013                | GU012555.1    |
|  | <i>Danaus erippus</i>                 | 1 | GenBank    | LN880851.1                                                                                 | Pierce, Biol J Linn Soc, 2016              | MF547376.1    |
|  | <i>Danaus plexippus</i>               | 1 | GenBank    | JQ771507.1                                                                                 | Zhen et al, Science, 2012                  | KT133515.1    |
|  | <i>Limenitis archippus</i>            | 1 | GenBank    | JQ771509.1                                                                                 | Zhen et al, Science, 2012                  | KT127045.1    |
|  | <i>Heliconius melpomene melpomene</i> | 1 | LepBase    | heliconius_melpomene_melpomene_hmel2_core_32_85_1__protein__HMEL005691g1.t2                | Heliconius Genome Consortium, Nature, 2012 | KJ174931.1    |
|  | <i>Heliconius erato demophoon</i>     | 1 | LepBase    | heliconius_erato_demophoon_v1_core_32_85_1__protein__evm.model.Herato0801.124.5            | Van Belleghem, Nat Ecol Evol, 2017         | KP074780.1    |
|  | <i>Junonia coenia</i>                 | 1 | LepBase    | junonia_coenia_jc10_core_32_85_1__protein__JC_0012304-RA                                   | Zhang, PNAS, 2017                          | GU089963.1    |
|  | <i>Melitaea cinxia</i>                | 1 | LepBase    | melitaea_cinxia_core_32_85_1__protein__MCINX014373-PA                                      | Ahola, Nat Commun, 2014                    | MH420044.1    |
|  | <i>Bicyclus anynana</i>               | 1 | GenBank    | XM_024099163.1                                                                             | Nowell, GigaScience, 2017                  | KR139591.1    |
|  | <i>Plodia interpunctella</i>          | 1 | LepBase    | plodia_interpunctella_v1_core_32_85_1__protein__maker-scaffold13-augustus-gene-0.99-mRNA-1 | Challis, bioRxiv, 2016                     | KT145708.1    |
|  | <i>Amyelois transitella</i>           | 1 | GenBank    | XM_013336683.1                                                                             | i5K Consortium, J Hered, 2013              | Not available |
|  | <i>Saucrobotys futilalis</i>          | 1 | GenBank    | HE956749.1                                                                                 | Dobler et al, PNAS, 2012                   | KT148281.1    |
|  | <i>Chilo suppressalis</i>             | 1 | InsectBase | CSU-MIDGUT012369                                                                           | Ma, PLoS ONE, 2012                         | KT955025.1    |
|  | <i>Trichoplusia ni</i>                | 1 | LepBase    | trichoplusia_ni_hi5v02_core_32_85_1__protein__evm.model.Scaffold82.5                       | Fu, eLife, 2018                            | KX862206.1    |
|  | <i>Spodoptera frugiperda</i>          | 1 | LepBase    | spodoptera_frugiperda_sf21v02_core_32_85_1__protein__evm.model.Scaffold329.10              | Kakumani, Genomics, 2014                   | MF197868.1    |
|  | <i>Trichordestra legitima</i>         | 1 | GenBank    | JQ771525.1                                                                                 | Zhen et al, Science, 2012                  | GU094372.1    |
|  | <i>Helicoverpa armigera</i>           | 1 | GenBank    | XM_021340407.1                                                                             | Pearce, BMC Biol, 2017                     | GU686955.1    |
|  | <i>Empyreuma pugione</i>              | 1 | GenBank    | LN736266.1                                                                                 | Dobler, Entomol Exp Appl, 2015             | MF924216.1    |
|  | <i>Lophocampa caryae</i>              | 1 | GenBank    | JQ771510.1                                                                                 | Zhen et al, Science, 2012                  | MF924301.1    |
|  | <i>Cycnia oregonensis</i>             | 1 | GenBank    | HE956750.1                                                                                 | Dobler et al, PNAS, 2012                   | GU091040.1    |
|  | <i>Cycnia tenera</i>                  | 1 | GenBank    | JQ771504.1                                                                                 | Zhen et al, Science, 2012                  | GU093833.1    |
|  | <i>Euchaetes egle</i>                 | 1 | GenBank    | JQ771508.1                                                                                 | Zhen et al, Science, 2012                  | GU092329.1    |
|  | <i>Pygoctenucha terminalis</i>        | 1 | GenBank    | HE956753.1                                                                                 | Dobler et al, PNAS, 2012                   | MF924291.1    |
|  | <i>Lerina incarnata</i>               | 1 | GenBank    | HE956754.1                                                                                 | Dobler et al, PNAS, 2012                   | MF922623.1    |

|               |                                |    |                |                                                             |                                                                         |            |
|---------------|--------------------------------|----|----------------|-------------------------------------------------------------|-------------------------------------------------------------------------|------------|
|               | <i>Operophtera brumata</i>     | 1  | LepBase        | operophtera_brumata_v1_core_32_85_1_protein_OBRU01_04616-PA | Derks, Genome Biol Evol, 2015                                           | HQ649012.1 |
|               | <i>Bombyx mori</i>             | 1  | GenBank        | XM_004921770.3                                              | International Silkworm Genome Consortium, Insect Biochem Mol Biol, 2008 | AB649195.1 |
|               | <i>Manduca sexta</i>           | 1  | GenBank        | S51591.1                                                    | Holzinger, FEBS Lett, 1992                                              | JN678236.1 |
|               | <i>Daphnis nerii</i>           | 1  | GenBank        | LN736265.1                                                  | Dobler, Entomol Exp Appl, 2015                                          | MK188140.1 |
| Siphon aptera | <i>Ctenocephalides felis</i>   | 1  | GenBank        | S66043.1                                                    | Reeves and Yamanaka, Insect Biochem Mol Biol, 1993                      | KY048350.1 |
| Diptera       | <i>Anopheles gambiae</i>       | 1  | GenBank        | XM_003436221.1                                              | Holt, Science, 2002                                                     | DQ465336.1 |
|               | <i>Aedes aegypti</i>           | 1  | GenBank        | XM_021837787.1                                              | Nene, Science, 2007                                                     | KX420491.1 |
|               | <i>Mayetiola destructor</i>    | 1  | EnsemblMetazoa | Mdes001311-RA                                               | i5K Consortium, J Hered, 2013                                           | KR742285.1 |
|               | <i>Rhagoletis zephyria</i>     | 1  | GenBank        | XM_017619496.1                                              | Ragland, Mol Ecol, 2015                                                 | KU511175.1 |
|               | <i>Ceratitidis capitata</i>    | 1  | GenBank        | XM_004535986.3                                              | i5K Consortium, J Hered, 2013                                           | EU733510.1 |
|               | <i>Zeugodacus cucurbitae</i>   | 1  | GenBank        | XM_011190816.1                                              | Sim and Geib, G3, 2017                                                  | MH751503.1 |
|               | <i>Bactrocera oleae</i>        | 1  | GenBank        | XM_014232491.1                                              | i5K Consortium, J Hered, 2013                                           | KY111512.1 |
|               | <i>Bactrocera latifrons</i>    | 1  | GenBank        | XM_018929031.1                                              | Peterson, PLoS ONE, 2009                                                | JX129505.1 |
|               | <i>Bactrocera dorsalis</i>     | 1  | GenBank        | XM_011214825.2                                              | Zheng, BMC Genomics, 2016                                               | KX051723.1 |
|               | <i>Dacus siliqualactis</i>     | 1  | Publication    | 10.1016/j.toxicon.2017.09.011                               | Schneider, Toxicon, 2017                                                | EU679328.1 |
|               | <i>Liriomyza eupatoriae</i>    | 1  | GenBank        | LT795109.1                                                  | Petschenka, Am Nat, 2017                                                | LT795097.1 |
|               | <i>Liriomyza sp. Mexico</i>    | 1  | GenBank        | HE956748.1                                                  | Dobler et al, PNAS, 2012                                                | HE862404.1 |
|               | <i>Liriomyza asclepiadis</i>   | 1  | GenBank        | HE956747.1                                                  | Dobler et al, PNAS, 2012                                                | HE862403.1 |
|               | <i>Napomyza lateralis</i>      | 1  | GenBank        | LT795079.1                                                  | Petschenka, Am Nat, 2017                                                | EF104710.1 |
|               | <i>Napomyza scrophulariae</i>  | 1  | GenBank        | LT795080.1                                                  | Petschenka, Am Nat, 2017                                                | LT795091.1 |
|               | <i>Chromatomyia horticola</i>  | 1  | GenBank        | LT795081.1                                                  | Petschenka, Am Nat, 2017                                                | LT795089.1 |
|               | <i>Phytomyza crassiceta</i>    | 1  | GenBank        | LT795078.1                                                  | Petschenka, Am Nat, 2017                                                | KR747618.1 |
|               | <i>Phytomyza digitalis</i>     | 1  | GenBank        | LT795083.1                                                  | Petschenka, Am Nat, 2017                                                | LT795093.1 |
|               | <i>Phytomyza ilicis</i>        | 1  | GenBank        | LT795077.1                                                  | Petschenka, Am Nat, 2017                                                | EU367541.1 |
|               | <i>Phytomyza fallaciosa</i>    | 1  | GenBank        | LT795082.1                                                  | Petschenka, Am Nat, 2017                                                | EU367595.1 |
|               | <i>Phytomyza hellebori A</i>   | 1A | GenBank        | LT795110.1                                                  | Petschenka, Am Nat, 2017                                                | LT795095.1 |
|               | <i>Phytomyza hellebori B</i>   | 1B | GenBank        | LT795111.1                                                  | Petschenka, Am Nat, 2017                                                | LT795095.1 |
|               | <i>Drosophila grimshawi</i>    | 1  | GenBank        | XM_001993757.1                                              | Drosophila 12 Genomes Consortium, Nature, 2007                          | GU597459.1 |
|               | <i>Drosophila virilis</i>      | 1  | GenBank        | BK008742.1                                                  | Carvalho and Clark, Genome Res, 2013                                    | DQ471577.1 |
|               | <i>Drosophila mojavensis</i>   | 1  | GenBank        | BK008743.1                                                  | Carvalho and Clark, Genome Res, 2013                                    | DQ383730.1 |
|               | <i>Drosophila willistoni</i>   | 1  | GenBank        | XM_015177397.2                                              | Drosophila 12 Genomes Consortium, Nature, 2007                          | JN705934.1 |
|               | <i>Drosophila ananassae</i>    | 1  | GenBank        | XM_001953862.2                                              | Drosophila 12 Genomes Consortium, Nature, 2007                          | JQ679117.1 |
|               | <i>Drosophila erecta</i>       | 1  | GenBank        | XM_001979324.2                                              | Drosophila 12 Genomes Consortium, Nature, 2007                          | JQ679121.1 |
|               | <i>Drosophila yakuba</i>       | 1  | GenBank        | XM_002096454.2                                              | Drosophila 12 Genomes Consortium, Nature, 2007                          | KJ767248.1 |
|               | <i>Drosophila melanogaster</i> | 1  | GenBank        | NM_169936.3                                                 | Adams, Science, 2000                                                    | KJ767244.1 |

|  |                                       |   |         |                |                                                |            |
|--|---------------------------------------|---|---------|----------------|------------------------------------------------|------------|
|  | <i>Drosophila sechellia</i>           | 1 | GenBank | XM_002044256.1 | Drosophila 12 Genomes Consortium, Nature, 2007 | KJ426007.1 |
|  | <i>Drosophila simulans</i>            | 1 | GenBank | XM_002102615.2 | Drosophila 12 Genomes Consortium, Nature, 2007 | KT112992.1 |
|  | <i>Drosophila persimilis</i>          | 1 | GenBank | XM_002013682.1 | Drosophila 12 Genomes Consortium, Nature, 2007 | AF451101.1 |
|  | <i>Drosophila pseudoobscura</i>       | 1 | GenBank | XM_001358575.3 | Richards, Genome Res, 2005                     | AF519412.1 |
|  | <i>Drosophila madeirensis</i>         | 1 | GenBank | JN882377.1     | Pegueroles, Heredity, 2013                     | U51613.1   |
|  | <i>Drosophila subobscura</i> (O3+4)   | 1 | GenBank | JN882412.1     | Pegueroles, Heredity, 2013                     | AF519409.1 |
|  | <i>Drosophila subobscura</i> (O3+4+1) | 1 | GenBank | KT318951.1     | Pegueroles, Sci Rep, 2016                      | AF519409.1 |
|  | <i>Drosophila subobscura</i> (O3+4+7) | 1 | GenBank | KT318959.1     | Pegueroles, Sci Rep, 2016                      | AF519409.1 |

156  
157  
158  
159  
160  
161  
162  
163  
164  
165  
166  
167  
168  
169  
170  
171  
172  
173  
174  
175  
176  
177  
178  
179  
180  
181  
182  
183  
184  
185  
186  
187  
188

189 **Supplementary Table 3.** References for ASR of cardiac glycoside feeding and sequestration.  
 190

| Clade              | References for ancestral state reconstruction of cardiac glycoside feeding and sequestration. |
|--------------------|-----------------------------------------------------------------------------------------------|
| <b>Hemiptera</b>   | Bramer, Proc R Soc B, 2015                                                                    |
|                    | Dobler, PNAS, 2012                                                                            |
|                    | Zhen, Science, 2012                                                                           |
|                    | Züst and Agrawal, Func Ecol, 2016                                                             |
| <b>Hymenoptera</b> | Boevé, BMC Evol Biol, 2013                                                                    |
|                    | Dobler, PNAS, 2012                                                                            |
|                    | Dobler, Entomol Exp et Appl, 2015                                                             |
| <b>Coleoptera</b>  | Dobler, PNAS, 2012                                                                            |
|                    | Labeyrie and Dobler, Mol Biol Evol, 2004                                                      |
|                    | Zhen, Science, 2012                                                                           |
| <b>Lepidoptera</b> | DaCosta, Ann ESA, 2006                                                                        |
|                    | Dobler, PNAS, 2012                                                                            |
|                    | Dobler, Entomol Exp et Appl, 2015                                                             |
|                    | Petschenka, J Insect Physiol, 2012                                                            |
|                    | Petschenka, Evolution, 2013                                                                   |
|                    | Zaspel, PLoS ONE, 2014                                                                        |
| <b>Diptera</b>     | Zhen, Science, 2012                                                                           |
|                    | Dobler, PNAS, 2012                                                                            |
|                    | Kearney, Entomol Exp et Appl, 1983<br>Pegueroles, Sci Rep, 2016                               |
|                    | Petschenka, Am Nat, 2017                                                                      |
|                    | Schneider, Toxicon, 2017                                                                      |

191  
 192  
 193  
 194  
 195  
 196  
 197  
 198  
 199  
 200  
 201  
 202  
 203  
 204  
 205  
 206  
 207  
 208

209 **Supplementary Table 4.** Sequences of gRNAs for generation of knock-in fly lines.  
 210

|                |                                             |
|----------------|---------------------------------------------|
| sgRNA1 Round 1 | GCAGGGTCTAAGTCACGCCA <u>AGG</u> (+ strand)  |
| sgRNA2 Round1  | GTTCCGCCACCGTCATCCGCG <u>AGG</u> (+ strand) |
| sgRNA1 Round 2 | GAGAGGGATAATATCGTTAG <u>TGG</u> (- strand)  |
| sgRNA2 Round 2 | GAAACTCACGCTGCGCGCTG <u>AGG</u> (+ strand)  |

Protospacer in yellow; PAM in blue; underlined base in each of the sgRNAs of the second round were altered in the donor sequence to avoid retargeting of the newly formed allele.

211  
 212  
 213  
 214  
 215  
 216  
 217  
 218  
 219  
 220  
 221  
 222  
 223  
 224  
 225  
 226  
 227  
 228  
 229  
 230  
 231  
 232  
 233  
 234  
 235  
 236  
 237  
 238  
 239  
 240  
 241  
 242  
 243  
 244  
 245  
 246  
 247  
 248  
 249

250  
251

**Supplementary Table 5.** Primer sequences for screening and validating knock-in fly lines.

| Primers for Screening by GV                                               | Sequence (5'-3')                | Purpose                              |
|---------------------------------------------------------------------------|---------------------------------|--------------------------------------|
| <i>For Deletion Line</i>                                                  |                                 |                                      |
| Δ_5'Arm_F                                                                 | AAGGAAATATGGCCTTGTACTAATACCAAG  | Validate sequence of 5' homology arm |
| Δ_5' Arm_Junction GFP_R                                                   | AAGTCGCCATGTTGGATCGACT          |                                      |
| Δ_3' Arm_Junction GFP_F                                                   | CCTGGGCATGGATGAGCTGT            | Validate sequence of 3' homology arm |
| Δ_3' Arm_R                                                                | CCTCGGTTTCGTGGATGGAC            |                                      |
| <i>For Knock-in Lines</i>                                                 |                                 |                                      |
| PrimerF_GV_Screen                                                         | TGTCGGCTAATGGGTCTCGC            |                                      |
| PrimerR_GV_Screen                                                         | AAGTTGCGCGCCTCGATGAT            |                                      |
| <i>For Validating Sequence of Knock-in Lines (Flanking Homology Arms)</i> |                                 |                                      |
| Fw1_left/right arm:                                                       | ATTCGCTATGTATAACGATGGCC (65 °C) |                                      |
| Fw2_left/right arm:                                                       | CACTGGCGAAATGTTTACAGCG          |                                      |
| Rv1_left/right arm:                                                       | CATGTAGGCATTGTTGAACGCC (68 °C)  |                                      |
| Rv2_left/right arm:                                                       | CTCCTCGTCCAGAACCTTCTCC          |                                      |

252  
253  
254  
255  
256  
257  
258  
259  
260  
261  
262  
263  
264  
265  
266  
267  
268  
269  
270  
271  
272  
273  
274



Supplementary Table 6. Sequences of knock-in and  $w^{118}$  control (QAN\*) fly lines.

|                                                                                                                                                                |                                                                                                                                                                                                                                                                                                                                                                                                                                                                                                                                                                                                                                                                                                                                                                                                                                                                                                                                                                                                                                                                                                                                                                                                                                                                                                                                                                                                                                                                                                                                                                                                                                                                                                                                                                                                                                                                                                                                                                                                                                                                                                                                                                                                                                                                                                                                                                                                                                                                                                                                                                                                                                                                                                                                                                                                                                                                                                                                                                                                                                                                         |
|----------------------------------------------------------------------------------------------------------------------------------------------------------------|-------------------------------------------------------------------------------------------------------------------------------------------------------------------------------------------------------------------------------------------------------------------------------------------------------------------------------------------------------------------------------------------------------------------------------------------------------------------------------------------------------------------------------------------------------------------------------------------------------------------------------------------------------------------------------------------------------------------------------------------------------------------------------------------------------------------------------------------------------------------------------------------------------------------------------------------------------------------------------------------------------------------------------------------------------------------------------------------------------------------------------------------------------------------------------------------------------------------------------------------------------------------------------------------------------------------------------------------------------------------------------------------------------------------------------------------------------------------------------------------------------------------------------------------------------------------------------------------------------------------------------------------------------------------------------------------------------------------------------------------------------------------------------------------------------------------------------------------------------------------------------------------------------------------------------------------------------------------------------------------------------------------------------------------------------------------------------------------------------------------------------------------------------------------------------------------------------------------------------------------------------------------------------------------------------------------------------------------------------------------------------------------------------------------------------------------------------------------------------------------------------------------------------------------------------------------------------------------------------------------------------------------------------------------------------------------------------------------------------------------------------------------------------------------------------------------------------------------------------------------------------------------------------------------------------------------------------------------------------------------------------------------------------------------------------------------------|
| <p>QAN*<br/>- Exons in green</p>                                                                                                                               | <p>&gt;QAN* (<math>w^{118}</math> wild type) Sequenced <i>ATPa</i> region<br/>ATTTTGAATCTCCATTCATTAAGAATATATATTGTTCAAGGAAATATGGCCTTGTACTAATACCAAGCAGTTTTTTGTCTTTTGC<br/>TCGATTTTAAAAGTTTTCCAAATGAACAGGAGTTCAACTAGTTGTTGTTTTTCCATTTGTTTTCCTTGATGTCATGGCAACCCCA<br/>ACAATGACGTCAGAGAGCAAAAATCACTGCCCGTGCCTTTGAAAAAAAGAGAACACTTATAGACACTGTTAAAAGATAGAATGC<br/>CAGACTAGACAGCTGCTAAGACTATATATAATAATAAATTGTAATCCACATATATTTAATTTAGAATTCCTTCTTTTCCCTTC<br/>TTATTTTTTATTGGCCAATTCAAAGGCTTCGAGGTACGGAATGCATAGTAAATCTATATATTTTGGTTGCACGTGAGGAAA<br/>AGTTACTTTCATTCATTTTTTCGATTTAAATTTTTTTTAGTTCCCTTTGTTTGTATACGTAGCATATGTTGAGGAAACAAATGTTT<br/>GTATAATTGCTTGATGTTTTGTTTGTGCACCTCAATTCATTACGTGCTTCTTCATTCGATCGGGAGCCGATTTAGCGCCGCAAT<br/>TTGCATGCTTAGATTGCGATTACTAGAGCTTACGTATCACAGAGGTCGTTTGAATATTCTCACGCTCGAATCATTTCGGAATG<br/>GGTTCGCCCAAGTCTATAACACATCCCCGTGCACAGGTTCCGAAAACTCACTTGACAAGTAGTAAATTTAAGTCGGGTAAAGTAGTT<br/>AACAAACGGGTACCGGTACTTAACCTTACTTAACTGACCCCTAACTCTTAAATGGTAAACGGAAACAGTTGACTATTTGAGGGTTTC<br/>TTAGTGCAAACTATCGTAAACTTCTCTATCCACTTCTCTGTAACCAATCCCAAAACACACTGGTAAATATGTAATCTTAACTTACG<br/>CCTTTTTGAAAGGCTAACCAAGGCTAAGTAATCAATCGAATTTTGTGTCGGCTAATGGGTCTCGCTGCAGTGCATTAACCTTCC<br/>GCCACTAACGATATTACCTCTCAACTCAACAGTCAAGACGCAAGATGCCGGCCAAAGTTAATAAAAAGGAGAAATTTAGATGAT<br/><b>TC</b>AAACAGGAGTTGGATTCGATTTTCATAAAAATCTCCTGGAGGAATGTAATCAGCGCTTTCAGACACATCCCGAAATTTAGG<br/>TGCAGCATTTAGTAAATGGTATCCCATTCGATATGTGAACCTATACGTTTITGATCTCCCGAGGCTCAAGTCAAGCCCAAGGCCA<br/>AGGAAAATCTGGAGCGCATGTTGCCAATGGCGTGCAGCCACCAAGCAGACGCCGAATGGGTGAAGTCTCTGTAAGAACCTGTT<br/>CGGTGGCTTCGGCAITGTTGTTGGATCGGTGCTATTTCTGCTTGTGGCTATTCATAACAGCCAGCAGCCAGTTCGGAGCCGCG<br/>CGAGGATAATTTGATCTGGGTATTTGACTTTCCCGCTGCTGCTATCTGTGACGGGCATTTCCTCATACTATCAGGATATGTTCCCTCA<br/>AATCTGAGCAGCTAAAGATCCGCTTACTACTGTTGTTATGTTTCCGAGGAAATCGAAAAGTTCTAAGATCATGGAATCTGTTCAA<br/>AACATGTTACCCAGTTCGCCACCTGCTATCCCGAGGGCAGAAAATCAGCTCGCGGCTGGAGGATCTGTTCTGGGCGAGTGTCTG<br/>TGGGTGAAATTCGGCAGCGATTCGCCGTGATATCCGCAATCCGATCATCGAGGGCGCAACTCAAGTGGACAACCTCTGCTGACCG<br/>GCGAGTCGGAGCCGAGTCCCGCGTCCGAGTTCACCATGAGAATCCGCTGGAGACCAAGAATTCGGCTTCTTCCACCAAC<br/>GCCGTCGAGGGCACTGCCAAGGGTGTGGTCTACAGCTCGGGCGATCACACCGTATGGGCCGATTTGGCTTCCCTCCCGTCT<br/>AGACACCCGCGAGACGCCCATTCGCAAGGAGATCCACATTTCAATCCACTTATTACCGGCTGGCCGTTTCTGGGGCTCACT<br/>TCTTCGTGATTGCCITCATCTCGGCTTACCAGTGGCTGGACGCTGTCATCTTTTGAATCGGTTATCATCGTCCCAACGTTGCCAGG<br/>TCTGCTGCCACCGTAACTGTGTGCCITGACCTTACCGCCAAGCGTATGGCCATAAGAAGACTGTTGGTGAAGAACTCGGAGCCG<br/>GTGGAGCCCTTGGCTCCACATCGACCTTCTGCTCGGATAAGACCGGCACCTCACCCAGAACCGAATGACGGTCCGCCACATGTT<br/>GTTGATAATCAGATCACTGAGGCCGACACAACAGGATCAGTGGGTGTCAATACGATAGAACAGCCCTGGAATCAAGGCG<br/>CTCTCTCGCATTTGCCACTCTCTGTAACCGTGCAGGTTCAAGGGAGGCCAAGATGGCGTCCCAATCTCAAGAAAGAAAGTCAAGT<br/>AGATGCCCTCCGAGGCTGCTCTGCTCAAGTGCATGGAAGTGGCTTGGCGATGTGATGAACATTCGCAAGCGTAATAAGAAAT<br/>CCCGAGGTGCCCTCAACTCCACAAATAACCAAGTGTCTTCCATCCGAAACCCGAGGATACCACGATCCCGCTACTTGTCTG<br/>AATG</p>                                                                                                           |
| <p>QAN<br/>- Homology arms underlined<br/>- Exons in green<br/>- Point mutations to prevent Cas9 retargeting in blue</p>                                       | <p>&gt;QAN (engineered control) Sequenced <i>ATPa</i> region<br/>CGCTATGTATAACGATGGCCAATAATAATGTCATATAAATGTTGGCCATTTTGAATATCTCGGAGTTATTTTCGAATCTCCATTCATT<br/>AAAAGATATATTATTGTTCAAGGAAATATGGCCTTGTACTAATACCAAGCAGTTTTTTGTCTTTTGTCTGATTTTAAAAGTTTCCCA<br/>AATGAACAGGAGTTCAACTAGTTGTTGTTTTTTTCCATTTGTTTTTCTTGTATGATGGCAACCCCAACAATGACGTCAGAGAGCA<br/>AAAAACTGCTGCCCGTGCCTTTGAAAAAAGAGAACACTTATAGACACTGTTAAAAGATAGAATGCCAGACACTAGACAGCGTCT<br/>AAGACTATATAATAATAAATGTTGAATCCACATATTTTAAATTTAGAAATTTCTTCTTCTTCTTCTTCTTCTTCTTCTTCTTCT<br/>ATTCAAAGGCTTTCGAGGTCAGCGAATGCATAGTAAATCTATATAATTTGGTTGCACGTAGGAAAAGTTACTTTTCAATTCATTTT<br/>TTTCGATTTAAATTTTTTTTAGTTCTTGTTTTTGATAGCTAGCATATGTTGAGGAAACAAATGTTGATATAATTTGCTTGATGTT<br/>GTTTGTGACCTCAATTCATTTACGTTGCTTCTTCATTTTCGATTCGGGAGCGTATTTAGCCGCGCATTTCGATGCTTAAATGCGA<br/>TACTAGAGCTTACGTTACAGAGGTCGTTTTGAAATTTCTCAGCTTCGAATCATTTCGGAATGGGTTCCGCCAAGTCTATAAC<br/>CACATCCCGTGACACAGGTTCCGAAAATCACTGCAAGTAGTAAATTAAGTGGGTAAGTAGTTAAACAACGGGTACCGGTAAC<br/>AACTATCTTAACTGACCCCTTAAGTGTAAAGGTAAGGAAACAGTTGATCTTATTTGAGGGTTTCTCAGTTGAAACCTATCGTGA<br/>AACTTCTCTATCACCTTCTGTAACCAATCCAAAACACACTGGTAAATTTGAATCTTTTACGCCCTTTTGAAGGCGCTAAC<br/>CAAGCCATGAAGTAAATTCGAAATTTGTGTCGGTATTTGGTTCTGCTGTCAGTGCATTAATTTCCGCTCACTAACGATATATTC<br/>CTCTCAACTCAACAGTCAAGACGCAAGATGCCGGCCAAAGTTAATAAAAAGGAGAAATTTAGATGATCTCAAAACAGGAGTTGGATA<br/><b>TC</b>GATTTTCAATAAAATCTCTCCGAGGAATTTGATCAGCGCTTCAGACACATCCCGAAAAATGTAAGTGCAGCATTTGAGTAAATG<br/>GTATCCCATTCGATATGTAACCTATACGTTTTGATCTTCCGAGGCTCAAGTCAAGCAGCAACCCCAACAATGACGTCAGAGAGCA<br/><b>AT</b>GGTCCCAAATGGCTGACGCCACCAAGCAGACGCGGAAATGGGTGAAAGTTTGTGAAGAACCCTGTTCCGTTGGCTTCGCGCATGTTG<br/>CTGTGGATCGGTGCTATCTCTGCTTTTGGGCTATTCATAACAGGCCAGCACCAGCGAGGAGCCGCGGCGAGGATAATTTGATCTG<br/>CGTATTTGACTTCCGCTGCTGCTATCTGTGACGGGCAATTTTCTCATACTAAGGATGTTGTTGCCCTCAAACTGAGCAGCTAAAGAT<br/>GCGCTTACTAACTGTGGTATGTTTCCGAGGAATCGAAAAGTTTAAAGATCATGGAATCTGTTCAAGAACATTTGATACCCGATTCG<br/>CCACCGTCACTCCGAGGGCGAGAAACTACCGTCCGCGCTGAAGATCTGTTTCGGGCGATTCGTTGAGGTGAAATTTCCGCGCA<br/><b>CC</b>GATTTCCCGCTTGAATCCCGATCATCTCGAGGGCCGCAACTCAAGGTGGACAACCTCCGCTGACCCGCGGAGTCGGAGCCGATTC<br/>CCGCGGTGCGGAGTTACCCATGAGAAATCCGCTGGAGACCAAGAAATCTGGCTTCTCTCCACCAACCGCTTCCGAGGCGACTGCC<br/>AGGGTGGTGTCTCAGCTGTTGGGATCACACCGTCAACGCTATGCGCCGCTATGCTGCGGCTGAGCAGGAGCAGGAGCCG<br/>CATTCGCAAGGAGATCCACCAATTTCACTCCCTTATTACCGGCTGGGCGGTTCTTCCGGGCTCACCTTCTCGTATTTGCCCTCA<br/>CTGGGCTACCCTGGCTGGACGCTGTCATCTTTTGAATCGGATATCATCTGCGCAACAGTCCCGAGGGCTGCTGCTGCCACCGTAA<br/>CTGTGTCCTGACCTTACCGCCAAAGCGTATGGCTCAAGAAGCTGCTGTGGTGAAGAAATCTGGAGGCCGTTGAGACCCCTTGGCTCC<br/>ACATCGACCATCTGCTCCGATAAAGACCGGCACCTCACCCAGAACCGAATGACGGTCCGCCACATGTTGTTGATTAATCAGATCAT<br/>CGAGGCGCACACAACAGGATCAGTCCGGGTTTCAATACGATAGAACCCAGCCCTGGATTCAGAGCCGCTCTCTCGCATTTGCCACT<br/>TCTGTAACCGTCCGAGTTCAAGGAGGCCAAGATGGCTCCCAATCTCAAGAAGAAAGTCAAGTGGAGATGCTCCGAGGCTGCTG<br/>TCTGCTAAAGTGCATGGAACCTGCTGCGGAGATGATGAACATACGCAAGCGTAAATAAGAAGATTTCCCGAGGTTGCCCTTCAAC<br/><b>TC</b>CAACAAATAACCAAGTGTCCATCCAGAAACCGAGGATACCAACGATCCCGCTACTTGTCTGTAATC</p> |
| <p>LAN<br/>- Homology arms underlined<br/>- Exons in green<br/>- Point mutations to prevent Cas9 retargeting in blue<br/>- Point mutation for Q111L in red</p> | <p>&gt;LAN Sequenced <i>ATPa</i> region<br/>TTTTGATACTCCGAGTTTATTTTCGAATCTCCATTCATTAAGAATATATATTGTTCAAGGAAATATGGCCTTGTACTAATACCA<br/>AGCAGTTTTTTGCTTTTGTCTGATTTTAAAAGTTTCCAAATGAACAGGAGTCAACTAGTTGTTGTTTTTCCATTTGTTTTCTCT<br/>TGATGATGGAACCCCAACAATGACGTCAGAGAGCAAAAATCACTGCCCGTGCCTTTGAAAAAAAGAGAACACTTATAGAC<br/>ACTGTTAAAAGATAGAATGCCAGACACTAGACAGCTAAAGACTATATAATAATAATAAATTTGAAATCCACATATTTTATTTA<br/>GAATCTCTTCTTCTTCTTCTTATTTTTTAAATTTGGCCAAATCAAAGGCTTTCGAGGTCAGCGAATGCATAGTAAATCTATATTT<br/>TTTTTTGTCAGTGTAGGAAAAGTACTTTTTCATTCATTTTTTTCGTTATTTTAAATTTTTTTTTTATTGTTTCTTTGTTTCTGAT<br/>ATGTTAGGAAACAATGTTTGTATAAATGTTGATGTTTGTGTTGTTGTTGTTGTTGTTGTTGTTGTTGTTGTTGTTGTTGTTGTTG<br/>AGCGTATTTAGCGCGCATTTTGTATGCTTGTGATTAAGTGTGATTAAGTGTGATTAAGTGTGATTAAGTGTGATTAAGTGTGATTA<br/>CTGAACTATTCCGAAATGGGTTCGCCAAGTCTATAACCACATCCCGTGCACAGGTTCCGAAAATCACTTGACAAGTGTATAA<br/>TTTAAGTCCGGTAAGTATTAACAACGGTACCCTGACTTAACCTATCTTAACTGACCTTAACTCTTAATGTTAAACGGAAAGCAG<br/>TTGATCATTTTGGGGTTTCTCAGTGCAAAACCTATCGTAAACTTCTCTATCCACTTCTCTGTAACCAATTCGCAAAACACT<br/>GGTAATTAATGAATCCCTTACGCTTTTTTGAAGGCTAACCAAGGCTGAAAGTAAATCGAATTTTGTGTCGGCTAATGGGTCTCG<br/>CTGCAAGTGCATTAACCTCCGCTCACTAACCTCAACAGTCAAGACGCAAGATGCCGGCCAAAGTTAATAAAAAGGAGAAATTTAG<br/>AAAAGGAGAAATTTAGATGATCTCAAAACAGGAGTTGGATTCGATTTTCATAAAAATCTCCTCCGAGGAAATTTAGTACCGCTTCA<br/>CACATCCGCAAAAATGTAAGTGCAGCATTTGAGTAAATGTTATCCCATTCGATATGTTGAACCTTATACGTTTTTGTATTTCCGAG<br/>GGTCTAAGTACGCCAAGGCCAAGGAAAATCTGGAGCGCATGGTCCCATGCGCTGACCGCACCAAGCAGACGCGCGAATGG<br/>GTAAGTCTCTGTAAGAACCTGTTGGTGGCTTCGCAATGTTGCTGTTGAATCGGTTGCTATTTCTGCTTGTGGCCATTTCTATCC<br/>TGGACCAACAGCGAGGAGCCGCGCACGATAATTTGATATTCGGGATTTGATCTTCCGCTGTCGCTATCTGTCATCTGTCATCTG<br/>ATACTACAGGTATGTTTCCCTCAAATCTGAGCAGCTAAAAGATCGGCTTACTAAGTGGTATGTTTCCCGAGGATTCGAAGAAAT<br/>TCTAAGATCAAGGAAATGTTCAAGAACATGGTACCCAGTTCCGCCACGCTACCCGAGGGCGAGAAAATCACTGCTGCGGCTG<br/>AAGATCTGTTTCGGCGATGCTGTTGAGGTGAAAGTTCGGCAGCGATCCCGCTGATATCCGATCATGAGGCGCGCAACTTC</p>                                                                                                                                                                                                                                                                                                                                                                                                                                                                                                                                                                                                                                                                                                                                                                                                                                                                                                                                                                                                                                                                                          |

|                                                                                                                                                                               |                                                                                                                                                                                                                                                                                                                                                                                                                                                                                                                                                                                                                                                                                                                                                                                                                                                                                                                                                                                                                                                                                                                                                                                                                                                                                                                                                                                                                                                                                                                                                                                                                                                                                                                                                                                                                                                                                                                                                                                                                                                                                                                                                                                                                                                                                                                                                                                                                                                                                                                                                                                                                                                                                                                                                                                                                                                                                                                               |
|-------------------------------------------------------------------------------------------------------------------------------------------------------------------------------|-------------------------------------------------------------------------------------------------------------------------------------------------------------------------------------------------------------------------------------------------------------------------------------------------------------------------------------------------------------------------------------------------------------------------------------------------------------------------------------------------------------------------------------------------------------------------------------------------------------------------------------------------------------------------------------------------------------------------------------------------------------------------------------------------------------------------------------------------------------------------------------------------------------------------------------------------------------------------------------------------------------------------------------------------------------------------------------------------------------------------------------------------------------------------------------------------------------------------------------------------------------------------------------------------------------------------------------------------------------------------------------------------------------------------------------------------------------------------------------------------------------------------------------------------------------------------------------------------------------------------------------------------------------------------------------------------------------------------------------------------------------------------------------------------------------------------------------------------------------------------------------------------------------------------------------------------------------------------------------------------------------------------------------------------------------------------------------------------------------------------------------------------------------------------------------------------------------------------------------------------------------------------------------------------------------------------------------------------------------------------------------------------------------------------------------------------------------------------------------------------------------------------------------------------------------------------------------------------------------------------------------------------------------------------------------------------------------------------------------------------------------------------------------------------------------------------------------------------------------------------------------------------------------------------------|
|                                                                                                                                                                               | <p>AAGGTGGACAACTCCCTGCGTGACCGGCGAGTCGGAGCCAGTCCCGCGGIGCCGAGTTCACCCATGAGAATCCCGCTGGAGACGA<br/> AAGATCTGGCCCTCTCTCCACCAACGCCGTCGAGGGCAGCTGCCAGGGGIGTGGTCATCAGCTGGCCGCGATCACCCGCTAGGAGTGGG<br/> CGCATTCGCTGGCCCTGGCTCCGGCTAGACACCGCGGAGACGCCCATGGCAAGGAGATCCACCATTTTATCCACCTTATATACCGG<br/> CGTGGCCCGTGTCTGGGGCTACCTCTCTCGTGTATGGCTTCATCCCTGGGCTACCACCTGGCTGGACCGTGTCACTCTTTTGTATCGGT<br/> ATCATCGTCGCCAACGTGCCGAGGGGCTGTCTGGCCACCGTAACTGTGTGCTGACCCCTACCGCAACCGCTATGGCTCAAAGGA<br/> CTGCTGGTGAAGAACTGGAGGGCCGTGGAGACCCCTGGCTCCACATCGACCATCTGCTCCGATAAGACGGCCACCTCCACCCAGA<br/> ACCGAATGACCGGTCGCCACATGTGGTTCGATAAATCAGATCATCGAGGCCGACACAACTGAGGATCAGTCGGGIGTTCATTAACGA<br/> JAGAACCAGCCCTGGATTCAGGGCCCTCTCTGCATTCGACACTCTGTAAACCTGGCCGAGTTCAGGGGAGGCCAAGATGGCGGTCC<br/> CAATCTCAAGAAAGAGTCAGTGGAGAIGCTCCGAGGCTGCTGCTCAAGTGCATGGAACCTGGCTCTGGGCGATGTAIGA<br/> CATTCGCAAGCGTAATAAGAAAGATTCGCGAGGTGGCCCTTCAACTCCACCAAAATACCAAGTGTCCATCCAGAAACCGGAGGAT<br/> ACCAACGATCCCGCTACTGCTCGTAATG</p>                                                                                                                                                                                                                                                                                                                                                                                                                                                                                                                                                                                                                                                                                                                                                                                                                                                                                                                                                                                                                                                                                                                                                                                                                                                                                                                                                                                                                                                                                                                                                                                                                                                                                                                                                                                                                                                                                                                                        |
| <p>LSN<br/> - Homology arms underlined<br/> - Exons in green<br/> - Point mutations to prevent Cas9 retargeting in blue<br/> - Point mutations for Q111L and A119S in red</p> | <p>&gt;LSN Sequenced <i>ATPa</i> region<br/> TTTTCGAATCTCCATTCATTAAGAATATATTATGTTCAAGGAAATATGGCCCTGTACTAATACCAAGCAGTTTTTGTCTTTTGTCT<br/> CGATTTTAAAGTTTTTCCAAATGAACAGGAGTTCACCTAGTGTGTGTTTTTCCATTTGTTTTTCTTGATTCGATGGCAACCCCAA<br/> CAATGACGTCAGAGAGCAAAAAATCACTGCCGTGGCTCTTGAAAAAAGAGAACACTTATAGACACTGTAAAAGATAGAATGCC<br/> AGACACTAGACAGCTGCTAAGACTATATATAATAATAAATTTGAATCCACATATATTTTATTAGAAATCTCTTCTTTCTCTTCT<br/> TATTTTTTTTATTTGGCCAAATCAAAGGCTTTCGAGGTCAGCGAATGCATAGTAAATCTATATATTTTTTGGTGTGACTGTAGGAAAA<br/> GTTACTTTTTCATTCATTTTTTTCGTAATTAATTTTTTTAGTTCCTTTGTTTTGTATACGTAGCATATGTGTAGGAACAAATGTGTTG<br/> TATAATGCTTGAATGTTTTGTTGTGACCTCAATTCATTCAGTGTCTCTCTCATTTTCGATCGGGAGCGTCATTTAGCGCCATTT<br/> TGCAATGCTTAGATTGGATTACTAGAGCTTACGATACACAGAGGTCGTTTTGAATATCTCAGCTCGAACTCATTTCCGAAITGG<br/> GTTCCGCCAAGCTATAACACATCCCGTGCACAGGTTCCGAAAAATCACTTGACAAAGTAAATTTAAGTCGGGTAAAGTAAITTA<br/> ACAACGGGTACCGGTACTTAACTTATCTTAACCTGACCCCTAACTCTTAATGGTAAACGGAACAGTTGTACTATTTAGGGGTTTCT<br/> TCAGTGCAAACTTATCGTAACTTCTTCTATCCACTTCTCTGTAACCAATCCCAAAACACACTGGTAATATTTGAACTCTTTAGCC<br/> CTTTTTTGAAGGCCAACCAGGCAATGAAGTAAATCGAATTTTGTGTCGGCTAATGGGCTCTCGCTGCAGTGCATTAATTTCC<br/> GACTAACGATATTACCTCTCAACTCAACAGTCAAGACGCAAGATGCGGCCAAAGTTAATAAAAAGGAGAAATTTAGATGAT<br/> CTCAAAGAGATGGATATCGATTTTCATAAAATCTCTCCGAGGAAATGTATACAGCGCTTCAGACACATCCCGAAAAATGTAAG<br/> TGCAAGATTAGTAAATGGTATCCCATTCGATATGTGAACCTTATACGTTTTTGTATCTTCCGAGGTTCTAAGTCAAGCCAAAGGCCA<br/> AGGAAAACTTTGGAGCGGATGGTCCCAATGGCGTACGCCCAAGCAAGACGCCCGAATGGGTGAAGTCTGTGAAGAACCTGTG<br/> CGGTGGCTTCGCAATGTGTGTGGATCGGTGTATCTTCTGCTTTGTGGCTTATCTATCCCTGGCCAGCAGCAGGAGGAGCCCTC<br/> CGACGATAATTTGATCTGGGTAITGTACTTCCCGTGTGCTATCGTGCAGGGGCAATTTCTCACTATCAGGATATGTGTCCTCA<br/> AATCTGAGCAGTAAAGATCGGCTTACTAAGTGTGATGTGTTCCGAGGAAATCGAAAAGTCTAAGATCATGGAATCGTTCAG<br/> AACATGGTACCCAGTTCGCCACCGTCACTCCGAGGGCGAGAAACTACGCTCGCCGCTGAAGATCTGCTTGGCGGATGTCGT<br/> JGAGTGAAGTTCGGCGACCGTATCCCGCTGATATCCGATCATCGAGGCGCCGCACTCAAGGTGGCAACTCTCTCGTACGCG<br/> GCGAGTGGAGCCGAGTCCCGCGGTGGCGAGTTCACCAATGAGAAATCCGCTGGAGACCAAGAAATCTGGCCCTTCTCCACCAAC<br/> GCCGCTCGAGGGCACGCAAGGGTGTGGTATCAGCTCGCGCGATCACACCGTCAATGGCCGCAATGCTGGCCCTGGCTCCGGTCT<br/> AGACACCGGGGAGACGCCCATTTGCCAAGGAGATCCACATTTCACTCCACTTATTACCGCGCTGGCCGCTGTTCCGCGCTACCT<br/> TCTCTGATTTGCCCTCACTCCGGGCTACCACTGGCTGGACGCTGTCTATCTTTTGAATCGGATATCATCTGCCCAAGCTGGCCGAGG<br/> GTCTGCTGGCCACCGTAACTGTGTGCTGACCCCTACCGCAAGCGTATGGCCCTCAAAGAACTGTCTGGTGAAGAAATCTGGAGGCC<br/> GTGGAGACCTTGGCTCCACATCGACCATCTGCTCCGATAAGACCGGCCACCTCACCCAGAACCAGATGACGGTTCGCCACATATG<br/> GTTCCGATAATCAGATCATCGAGGGCCGACAACTGAGGATCAGTCCGGTGTCTCAATACGATAGAACCAGCCCTGGATTCAGGGCC<br/> CTCTCTCCGATTTGCCACTCTCTGTAACCGTGGCGAGTTCAGGGAGGCCAAGATGGCGTCCCAATCTCAAGAAAGAAAGTCAAGTGG<br/> AGATGCTCCGAGGCTGCTGCTCAAGTGCATGGAACCTGGCTGGGCGATGTAIGAACATTCGCAAGCGTAATAAGAAAGAT<br/> GCCGAGGTGGCCCTCAACTCCACCAAAATACCAAGTGTCCATCCAGAACTG</p>          |
| <p>VSN<br/> - Homology arms underlined<br/> - Exons in green<br/> - Point mutations to prevent Cas9 retargeting in blue<br/> - Point mutations for Q111V and A119S in red</p> | <p>&gt;VSN Sequenced <i>ATPa</i> region<br/> TTTTCGAATCTCCATTCATTAAGAATATATTATGTTCAAGGAAATATGGCCCTGTACTAATACCAAGCAGTTTTTGTCTTTTGTCT<br/> CGATTTTAAAGTTTTTCCAAATGAACAGGAGTTCACCTAGTGTGTGTTTTTCCATTTGTTTTTCTTGATTCGATGGCAACCCCAA<br/> CAATGACGTCAGAGAGCAAAAAATCACTGCCGTGGCTCTTGAAAAAAGAGAACACTTATAGACACTGTAAAAGATAGAATGCC<br/> AGACACTAGACAGCTGCTAAGACTATATATAATAATAAATTTGAATCCACATATATTTTATTAGAAATCTCTTCTTTCTCTTCT<br/> TATTTTTTTTATTTGGCCAAATCAAAGGCTTTCGAGGTCAGCGAATGCATAGTAAATCTATATATTTTTTGGTGTGACTGTAGGAAAA<br/> GTTACTTTTTCATTCATTTTTTTCGTAATTAATTTTTTTAGTTCCTTTGTTTTGTATGCGTAGCATATGTGTAGGAACAAATGTGTTG<br/> TATAATGCTTGAATGTTTTGTTGTGACCTCAATTCATTTAGCTGTCTCTCTCATTTTCGATCGGGAGCGTCATTTAGCGCCATTT<br/> TGCAATGCTTAGATTGGGATTACTAGAGCTTACGATACACAGAGGTCGTTTTGAATATCTCAGCTCGAACTCATTTCCGAAITGG<br/> GTTCCGCCAAGCTATAACACATCCCGTGCACAGGTTCCGAAAAATCACTTGACAAAGTAAATTTAAGTCGGGTAAAGTAAITTA<br/> ACAACGGGTACCGGTACTTAACTTATCTTCAACTGACCCCTAACTCTTAATGGTAAACGGAACAGTTGTACAATTTGAGGGTTCCT<br/> TCAGTGCAAACTTATCGTAAACTTCTCTATCCACTTCTCTGTAACCAATCCCAAAACACACTGGTAATATTTGAACTCTTTAGCC<br/> CTTTTTTGAAGGCCAACCAGGCAATGAAGTAAATCGAATTTTGTGTCGGCTAATGGGCTCTCGCTGCAGTGCATTAATTTCTCC<br/> GACTAACGATATTACCTCTCAACTCAACAGTCAAGACGCAAGATGCGGCCAAAGTTAATAAAAAGGAGAAATTTAGATGAT<br/> CTCAAAGAGATGGATATCGATTTTCATAAAATCTCTCCGAGGAAATGTATACAGCGCTTCAGACACATCCCGAAAAATGTAAG<br/> TGCAAGATTAGTAAATGGTATCCCATTCGATATGTGAACCTTATACGTTTTTGTATCTTCCGAGGTTCTAAGTCAAGCCAAAGGCCA<br/> AGGAAAACTTTGGAGCGCGATGGTCCCAATGGCGTACGCCCAAGCAAGACGCCCGAATGGGTGAAGTCTGTGAAGAACCTGTG<br/> CGGTGGCTTCGCAATGTGTGTGGATCGGTGTATCTTCTGCTTTGTGGCTTATCTATCCCTGGCCAGCAGCAGGAGGAGCCCTC<br/> CGACGATAATTTGATCTGGGTAITGTACTTCCCGTGTGCTATCGTGCAGGGGCAATTTCTCACTATCAGGATATGTGTCCTCA<br/> AATCTGAGCAGTAAAGATCGGCTTACTAAGTGTGATGTGTTCCGAGGAAATCGAAAAGTCTAAGATCATGGAATCGTTCAG<br/> AACATGGTACCCAGTTCGCCACCGTCACTCCGAGGGCGAGAAACTACGCTCGCCGCTGAAGATCTGCTTGGCGGATGTCGT<br/> JGAGTGAAGTTCGGCGACCGTATCCCGCTGATATCCGATCATCGAGGCGCCGCAACTCAAGGTGGCAACTCTCTCGTACGCG<br/> GCCGAGTGGAGCCGAGTCCCGCGGTGGCGAGTTCACCAATGAGAAATCCGCTGGAGACCAAGAAATCTGGCCCTTCTCTCCACCAAC<br/> GCCGCTCGAGGGCACGCAAGGGTGTGGTATCAGCTCGCGCGATCACACCGTCAATGGCCGCAATGCTGGCCCTGGCTCCGGTCT<br/> AGACACCGGGGAGACGCCCATTTGCCAAGGAGATCCACATTTCACTCCACTTATTACCGCGCTGGCCGCTGTTCCGCGCTACCT<br/> TCTCTGATTTGCCCTCACTCCGGGCTACCACTGGCTGGACGCTGTCTATCTTTTGAATCGGATATCATCTGCCCAAGCTGGCCGAGG<br/> GTCTGCTGGCCACCGTAACTGTGTGCTGACCCCTACCGCAAGCGTATGGCCCTCAAAGAACTGTCTGGTGAAGAAATCTGGAGGCC<br/> GTGGAGACCTTGGCTCCACATCGACCATCTGCTCCGATAAGACCGGCCACCTCACCCAGAACCAGATGACGGTTCGCCACATATG<br/> GTTCCGATAATCAGATCATCGAGGGCCGACAACTGAGGATCAGTCCGGTGTCTCAATACGATAGAACCAGCCCTGGATTCAGGGCC<br/> CTCTCTCCGATTTGCCACTCTCTGTAACCGTGGCGAGTTCAGGGAGGCCAAGATGGCGTCCCAATCTCAAGAAAGAAAGTCAAGTGG<br/> AGATGCTCCGAGGCTGCTGCTCAAGTGCATGGAACCTGGCTGGGCGATGTAIGAACATTCGCAAGCGTAATAAGAAAGAT<br/> GCCGAGGTGGCCCTCAACTCCACCAAAATACCAAGTGTCCATCCAGAACTG</p> |
| <p>VSH<br/> - Homology arms underlined<br/> - Exons in green<br/> - Point mutations to prevent Cas9 retargeting in blue</p>                                                   | <p>&gt;VSH Sequenced <i>ATPa</i> region<br/> CGAATCTCCATTCATTAAGAATATATTATGTTCAAGGAAATATGGCCCTGTACTAATACCAAGCAGTTTTTGTCTTTTGTCTCGA<br/> TTTTTAAAGTTTTTCCAAATGAACAGGAGTTCACCTAGTGTGTTTTTCCATTTGTTTTTCTTGATTCGATGGCAACCCCAA<br/> TGACGTCAGAGAGCAAAAAATCACTGCCGTGGCTCTTGAAAAAAGAGAACACTTATAGACACTGTAAAAGATAGAATGCCAGA<br/> CACTAGACAGCTGCTAAGACTATATATAATAATAAATTTGAATCCACATATATTTTATTAGAAATCTCTTCTTTCTCTTCTTAT<br/> TTTTTTTTTATTTGGCCAAATCAAAGGCTTTCGAGGTCAGCGAATGCATAGTAAATCTATATATTTTTTGGTGTGACTGTAGGAAAA<br/> ACTTTTTCATTCATTTTTTTCGTAATTAATTTTTTTAGTTCCTTTGTTTTGTATACGTAGCATATGTGTAGGAACAAATGTGTTGAT<br/> AATGCTTGAATGTTTTGTTGTGACCTCAATTCATTTAGCTGTCTCTCTCATTTTCGATCGGGAGCGTCATTTAGCGCCATTTG<br/> ATGCTTAGATTGCGATTACTAGAGCTTACGATACAGAGGTCGTTTTGAATATCTCAGCTCGAACTCATTTCCGAAITGGGTT<br/> GCCCAAGTCTAACCACATCCCGTGCACAGTTCGAAAAATCACTTGACAAAGTAAATTTAAGTCGGTAAAGTAAATCAAC<br/> ACGGGTACCGGTACTTAACTTATCTTAACTGACCCCTAACTCTTAATGGTAAACGGAACAGTTGTACTATTTTGGGGTTTCTTCA<br/> GTGCAAACTTATCGTAAACTTCTCTTATCCACTTCTCTGTAACCAATCCCAAAACACACTGGTAATATTTGAACTCTTTAGCCCT<br/> TTTTTGAAGGCCAACCAGGCAATGAAGTAAATCGAATTTTGTGTCGGCTAATGGGCTCTCGCTGCAGTGCATTAATTTCCGCTC<br/> ACTAACGATATTACCTCTCAACTCAACAGTCAAGACGCAAGATGCGGCCAAAGTTAATAAAAAGGAGAAATTTAGATGATCTC<br/> AAACAGGATGGATATCGATTTTCATAAAATCTCTCCGAGGAAATGTATACAGCGCTTCAGACACATCCCGAAAAATGTAAGTGC<br/> AGCATTTAGTAAATGGTATCCCATTCGATATGTGAACCTTATACGTTTTTGTATCTTCCGAGGTTCTAAGTCAAGCCAAAGGCCAAG</p>                                                                                                                                                                                                                                                                                                                                                                                                                                                                                                                                                                                                                                                                                                                                                                                                                                                                                                                                                                                                                                                                                                                                                                                                                                                                                                                                                                                                                                                                              |

|                                                                                                                                                                |                                                                                                                                                                                                                                                                                                                                                                                                                                                                                                                                                                                                                                                                                                                                                                                                                                                                                                                                                                                                                                                                                                                                                                                                                                                                                                                                                                                                                                                                                                                                                                                                                                                                                                                                                                                                                                                                                                                                                                                                                                                                                                                                                                                                                                                                                                                                                                                                                                                                                                                                                                                                                                                                                                                                                                                                                                                                                         |
|----------------------------------------------------------------------------------------------------------------------------------------------------------------|-----------------------------------------------------------------------------------------------------------------------------------------------------------------------------------------------------------------------------------------------------------------------------------------------------------------------------------------------------------------------------------------------------------------------------------------------------------------------------------------------------------------------------------------------------------------------------------------------------------------------------------------------------------------------------------------------------------------------------------------------------------------------------------------------------------------------------------------------------------------------------------------------------------------------------------------------------------------------------------------------------------------------------------------------------------------------------------------------------------------------------------------------------------------------------------------------------------------------------------------------------------------------------------------------------------------------------------------------------------------------------------------------------------------------------------------------------------------------------------------------------------------------------------------------------------------------------------------------------------------------------------------------------------------------------------------------------------------------------------------------------------------------------------------------------------------------------------------------------------------------------------------------------------------------------------------------------------------------------------------------------------------------------------------------------------------------------------------------------------------------------------------------------------------------------------------------------------------------------------------------------------------------------------------------------------------------------------------------------------------------------------------------------------------------------------------------------------------------------------------------------------------------------------------------------------------------------------------------------------------------------------------------------------------------------------------------------------------------------------------------------------------------------------------------------------------------------------------------------------------------------------------|
| <p>- Point mutations for Q111V, A119S and N122H in red</p>                                                                                                     | <pre> GAAAACITGGAGCGCGATGGTCCAAATGCGCTGACGCCACCCAGCAGACGCCGAATGGGTGAAGTTCGTGAAGAACCITGTTC GTGGCTTCGCCATGTGTCTGGATTCGGTCTAATCTCTGCTTTGGTGGCTATTCTATCAGCCAGCACCAGCGAGGAGCCCTCGG ACGATATTGATATCTGGGATTTGACTTCCCGTGTCTGATCGTCAGCGGCAATTTCTCTATACTACAGGATATGTGTCCCTCAAAT CTGAGCAGCTAAAGATCGGGTCTACTAATCTGGTATGTGTCCGCGAGAAATCGAAAAGTCTAAGAATCATGGAAATCGTTCAGAAG ATGGTAACCCAGTTCGCCACCGTCACTCCGCGAGGGCGAGAACTACCGCTGCGCGCTGAAGATCTCGTTCGGGCGATCGGTGGA GGTGAAGTTCGCCGACCGTATCCCGCTGATATCCCGATCATCGAGGCGCGCAACTTCAAGTGGGAACAACCTCGTTCAGCCGGG AGTCCGAGCCGAGTCCCGCGTGGCGAGTACCACTATCGAATCCCGCTGGAGACCAAGAATCTGGCTTCTCTCCCAACCGCC GTCCGAGGCGACTGCCAAGGGTGTGGTATCAGCTGTGGCGATCACACCGTATGGCCGCAATGTGCGGCTTCGCTCCGGCTCAGA CACCGGCGAGACGCCCATGGCAAGGAGATCCACATTTCACCTTATACCGGCGTGGCCGTTCTCCGCGCTCACTTCCT CGTGATTCGCTCATCCGCTGGGCTACCACTGGCTGGAGCGTGTCATCTTTTGATCGGTATCATCGTCGCCAACGTCGCGGAGGGTTC CTGGCCACCGTAATCTGTGTGCTGACCCCTACCGCAAGCGTATGGCTTCAAGAAATGTCTGGTGAAGAAATCTGGAGGCCGTGG AGACCCITGGCTCCACATCGACCATCTGCTCCGATAAAGACCGCCACCCCTACCCAGAACCGAATGACGGTTCGCCACATGTGGTTC GATAATCAGATCATCGAGGCCACACAACCTGAGGATCAGTCCGGTGTTCATAACGATAGAACCAGCCCTGGATTCAAGGCGCTCT CTCGCATTCGCACCTCTGTAAACCGTCCGAGTTCAGGGAGGCCAAGATGGCGTCCCAATCTCAAGAAAGAAGTTCAGTGGAGA TGCCCGGAGGCTGTCTGTCAAGTGTCAAGGATGGCTTCGGCGATGTGATGAACATTCGCAAGCGTAATAAGAAAGATTGCCG AGGTGCCCTTCAACTCCACCAACAATAACCAAGTGTCCATCCACGAAACCGAGGATACCAACGATCCCGCTACTGTCTGTAATG AAGGAG </pre>                                                                                                                                                                                                                                                                                                                                                                                                                                                                                                                                                                                                                                                                                                                                                                                                                                                                                                                                                                                                                                                                                                                                                                                                                                                                                                                                                                                                                                                          |
| <p>QSN<br/>- Homology arms underlined<br/>- Exons in green<br/>- Point mutations to prevent Cas9 retargeting in blue<br/>- Point mutation for A119S in red</p> | <p>&gt;QSN Sequenced <i>ATPa</i> region</p> <pre> TTTTGATATCTCGGAGTTTATTTTCGAATCTCCATTCATTAAGAATATATTATTGTTCAAGGAAATATGGCCTTGTACTAATACC AAGCAGTTTTTTGCTTTTGCTCGATTTTAAAAGTTTTCCAAAATGAACAGGAGTTCAACTAGTGTGTTTTTTCCATTTGTTTTCC TTGATTCGATGCAACCCCAACCAATGACGCTCAGAGAGCAAAAATACCTGCCCCGTCGTTGAAAAAAAGACATACATTTATAGA CACTGTTAAAAGATAGAAATGCCAGACACTAGACAGTGTAAAGACTATATATAATAATAAATTTTGAATCCATATATTATTATTT AGAATCTCTTCTTCTCTCTTATTTTTTTAATTTGGCCAATTCAGGGCTTCGAGGTCAGCGAAATGATAGTAAATCTATATATA TTTTGGTGTGCATGTAGGAAAAGTTACTTTTCTCATTTTTTTCGTATTTAAATTTTTTTTTAGTTCCTTGTGTATACGTAGCA TATGTGTAGGAACAAATGTTGTATAATTGCTGTAGTGTTTGTTTTGTTGACCTCAATTCATTACGTGTCCTCTCTCATGTCAGG GAGCCTTTATAGCGCATTTTGCATGGCTTAGATGTGATTAAGTACTAGAGCTTACGTATCACAGAGGTCAGTTTGAATATCTCAC GCTCGAATCATTTCCGAAATGGGTTCCGCCAAGTCTAATAACCAATCCCGTGCACAGGTTCCGAAAATCACTGTGCAAGTATGTA ATTTAAGTCGGGTAAAGTGTAAACAACGGGTACCCGTAACTTAATCTAATCTAATCCAGCCCTAACTCTTAATGGTAAACGGGAACA CTGTGTACTATTGTAGGGTTTCTCAGTGCAAACTATCGTAAACTCTCTCTCACTCTCTCTGTAACCAATCCAAAACAACAC TGGTAATTTGAATCTTACCGCTTTTTTGAAGAGCTTAAACCAGGCAATGAAATTAATCGAATTTGTGTCCGCTAATGGGTCTCG CTGCAATGTACTTAACTTCCGCTCACTAAGATTTACTCTCACTCAACAGTCAAGACGCAAGATGGCGGCAAGTTCAGGAAATG AAAAGGAGAATTTAGATGATCTCAAAACAGGAGTGGGATATCGAATTTCAAAAATCTCTCCAGGAAATTTAGTACAGCGCTTTCA GACACAATCCGAAAATGTAAGTGCAGCATTTGAGTAAATGGTATCCCATTCGATATGTGAACCTATACGTTTTGTATCTCCGAG GGTCTAAAGTCAACGCAAGGCCAAGGAAAATCTGGAGCGGATGGTCCAAATGGCGTACGCCACCCAAAGACAGCCGCGAAATGG GTGAAGTTCGTGAAGAACCCTGTTCCGGTGCCTGCCATGTGTCTGTGGATCGGTGCTATTCTGCTTTGTGGCCATATCTATCCAG GCCAGCACAGCGAGGAGCCGCTCCGACGATAATTTGATCTGGGTATTGTACTTCCCGTGTCTCAGTCTGTGACGGGCGATTTTCTCA TACTATCAGGTATGTGTCCCTCAAACTGTAGCAGCTAAAGATCGGCTTACTAATCTGTGGTATGTGTCTCCGAGGAAATCGAAAGT CTAAGATTTAGGAAATCGTTCAAGAACAATGGTACCCAGTTCGCCACCCTATCCCGGAGGCGGAGAACAACACGCTGCCGCTGTA GATCTCGTCTCTGGGCGATGTCGTTGAGGTGAAGTTCGGCGACCGTATCCCGCTGATATCCGCATCATCGAGGCCGCGCAACTTCA AGGTGGACAACCTCTCGTGCAGCCGGAGTCCGAGCCGAGTCCCGCGTGGCGAGTTCACCCATGAGAATCCGCTGGAGACCA GAATCTGGCTTCTCTCCACCAACCGCTCGAGGGGACATGCCAAGGGTGTGGTTCATCAGTTCGGGCGATCACACCGTCCGGCC GCATCTGTGGCTTGGCTCCGGTCTAGACACCGCGAGAGCCCAATGCCAAGGAGATCCACCATTTCACTCCACCTTATACCGGG GTGGCGGTGTCTGGGCGTCACTTCTCTGTATTTCTTCACTCTGCGCTACCTCCGCGTACCCTGCGTGGAGCGTGTCTTTTTGATCG ATCATCTGGTCCCAACGTCGCCGAGGGTCTGCTGGCCACCCTAAGTGTGGCTGACCTTCACCCGCAAGCGATGCGCTCAAGGTC GTCTGTGGTGAAGAACTGGAGGCCGTTGGAGACCTTGGCTCCACATCCGACCACTGTGTCCGATAAAGACCGCACCTCACCCAGA ACCGAAATGACGGTCGCCACATGTGGTTCGATAATCAGATCATCGAGGCCGACACAACCTGAGGATCAGTCCGGTGTTCATACGA TAGAACCCAGCCCTGGATTCAGGGCGCTCTCTCCGATTTGCCACTCTCTGTAACCGTGCAGGTTCAAGGGAGCCCAAGATGGGCTCC CAATCTCAAGAAAGTACAGTGGAGATGCTCCGAGGCTGCTCTGCTCAAGTGCATGGAACATGGCTCTGGGCGATGTGATGAA CATTCGCAAGCGTAATAAGAAAGATTCGCGAGGTTGCCCTTCAACTCCACCAACAATAACCAAGTGTCCATCCACGAAACCGAGGAT ACCAACGANCCCGCTACTTGTCTGTAATG </pre>                                        |
| <p>QAH<br/>- Homology arms underlined<br/>- Exons in green<br/>- Point mutations to prevent Cas9 retargeting in blue<br/>- Point mutation for N122H in red</p> | <p>&gt;QAH Sequenced <i>ATPa</i> region</p> <pre> TGATAACGATGGCCAAATAAATGTCATAAATAATGCCCATTGGAATATCTCGGAGTTTATTTTCAATCTCCATTCATAAAGA ATATATTATTTGTCAAGGAAATATGGCTTGTAAATACCAAGCAGTTTTTTGCTGATTTTGGCTGATTTTAAAGTTTCCAAATGA ACAGGATCTCAACTAGTGTGTGTTTTTCCATTTGTTTTCGATGTCATGGCAACCCCAACCAATGACCTCAGAGAGCAAAAAA TACTGCCCCGCTCTTGAAAAAAAGAGAACAACCTATAGACACTGTAAGAATAGAAATGCCAGACTAGACAGTGTCAAGAC TATATATAATAATAACTTTGAAATCCACATAATATTTTATTTAGAAATCTCTTCTTCTCTTATTTTTTATTTGGCCAAITCA AAGGCTTCGAGGTCAGCGAAATGCAATAGTAAATCTATATATTTTGGTGTGACTGTAGGAAAAGTFACTTTTCATCATTTTGTTCG TATTTAATTTTTTTTTAGTTCCTTGTGTTTGTATACGTAGCATAATGTGTAGGAAACAAATGTTGTATAATGTCTGTATTGTTTGT GTGACCTCAATTCATTTACGTGCTCTTCTCATTTTCGATCGGGAGCGTCATTTAGCGCGCATTTGTCATGCCCTAGATTGGCATTAC AGAGCTTACGTATCACAGAGGTCGTTTTGAAATATTCACGCTCGAACTCATTTCCGAATGGGTTCCGCCAATCTATAAACACAT CCCCGTGCACAGGTCGGAATACTGTGACAAAGTAAATTTAAGTCCGGTAAAGTAGTTAACAACGGGTACCGGTACTTAACTT ATCTCAACTGACCCCTAACITTAATGGTAAACGGAACAGTGTGACTATTTTGGGGTTCCTTCAGTGCACAACTCAATAACTT TCTCTATCCACTTCTCTGTAACCAATCCAAAACACACTGGTAATTTGAAATCTTTACCGCTTTTTTGAAGGCCATAACCAAGG CATGAAGTAAATCGAATTTGTGTCCGCTAATGGGCTCGGCTGAGTGCATCACTAAGCTCCGCTCACTAAGATATATTCCCTCA ACTAACAGTCAAGACGCAAGATGCCGCCCCAAGTTAATAAAAAGGAGAATTTAGATGATCTCAAAACAGGAGTGGGATATCGATT TTCATAAAAATCTCTCCCGAGGAATTTGATACAGCCGTTTACAGACATCCCGAAAATGTAAGTGCAGCATTTGAGTAAATGGTATCC CATTCGATATGTGAACCTTATACGTTTTTGATCTTCGCCAGGCTTAAGTACGCAAGCCCAAGGCAAGGAAAACCTTGGAGCGCATGGTTC CAAATGCTGTGACGCCACCCAGCAGACGCCCAATGTTGGTGAAGTTCGTGAAGAACCCTGTTCCGGTGGCTTCGCGCATGTGTGGTGG ATCGGCTGTACTCTGCTTTGTGGCTATCTTCTTCCAGGACAGCAGCGAGGAGCCCGGCCGACGATTTTGTATCTGGGATTT GTACTTTCGCTGTCGTCATCGTGCAGGGCATTTTCTCATACTATCAGGATATGTGTCCCTCAAATCTGAGCAGCTAAAGATCGGCTT ACTAATCTGGTATGTGTTCGCGAGGAAATCGAAAAGTTCATAAGATCATGGAATCGTTCAGAACAATGGTACCCAGTTCGCCCGCC TCACTCCGGAGGGCGAGAAAATCAAGCTGCGCGCTGAAGATCTCGTTCGGGCGATGTCGTTGAGGTGAAATTTCCGGCACCCGATATC CCCGTGTATACCGCATCATCGAGGCCGCAACTTCAAGTGGACAACCTCTCGTGCAGCCGGGAGTTCGGAGCCGCGAGTCCCGG GTGCCGAGTTCACCCATGAGAATCCGCTGGAGACCAAGAACTGGCCCTCTTCTCCCAACGCGCTGAGGGCACTGCAAAAGGTT GTGGTATACGCTGTGGCGATCACACCGTCAATGGGCGCAATGCTGGCCCTGGCTCCGGTCTAGACACCGGCCGAGACGACCCATGGC CAAGGAGATCCACCAATTCATCCACCTTATACCGGCGTGGCGGTTCCTGGGCGTCACTTCTCTGTATGTCCTCATCTCTGGG CTAACCTGGCTGGACGCTGTCACTTTTTGTATCGGTATCATCGTCGCCAACGTCGCGGAGGGTCTGCTGGCCACCGTAACTGTGTT CCTGACGCTTACCGCAAGCGTATGGCCCTAAAGAAATCTGCTGGTGAAGAAATCTGGAGGCCGTGGAGACCCCTGGCTCCACATCGA CCATCTGCTCCGATAAGACCGGCCACCTCACCCAGAACCAGTACCGGTGCGCCACATGTTGGTTCGATAATCAGATATCAGACGCC GACACAACCTGAGGATCAGTCCGGTGTTCATAACGATAGAACCAGCCCTGGATTCAGGGCGCTCTCTGCAATGCCCACCTGTGAA CCGTGCCAGTTCAGGGAGGCCAAGATGGCGTCCCAATCCCAAGAAAGAAGTTCAGTGGAGATGCTCCGAGGCTGCTCTGCTG AAGTGCATGGAACATGGCTCTGGGCGAATGTGATGAACATTCGCAAGCGTAATAAGAAAGTTCGCGAGGTTGCCCTTCAACTCCACA ACAATAACCAAGTGTCCATCCACGAAACCGAGGATACCAACGATCCCGCTACTTGTCTGTAATG </pre> |

277  
278  
279

280 **Supplementary Table 7.** Injections and number of independent lines established.  
 281

| <i>ATPα</i> genotype                                                    | Deletion (GFP+) | Engineered control (QAN) | LAN  | LSN | VSN | VSH | QSN | QAH |
|-------------------------------------------------------------------------|-----------------|--------------------------|------|-----|-----|-----|-----|-----|
| Nr of embryos injected                                                  | 720             | 720                      | 1200 | 720 | 720 | 720 | 720 | 720 |
| Nr of independent lines brought to homozygous state for knock-in allele | 1               | 1                        | 3    | 3   | 1   | 1   | 1   | 2   |

282  
 283  
 284  
 285  
 286  
 287  
 288  
 289  
 290  
 291  
 292  
 293  
 294  
 295  
 296  
 297  
 298  
 299  
 300  
 301  
 302  
 303  
 304  
 305  
 306  
 307  
 308  
 309  
 310  
 311  
 312  
 313  
 314  
 315  
 316  
 317

318 **Supplementary Table 8.** Primers used for RT-qPCR.  
319

| Primer  | Sequence (5' to 3')    | Amplification Efficiency |
|---------|------------------------|--------------------------|
| Rpl32_F | ATGCTAAGCTGTCGCACAAATG | 100%                     |
| Rpl32_R | GTTCGATCCGTAACCGATGT   |                          |
| ATPa_F1 | TGCTGTGGATCGGTGCTATTC  | 90%                      |
| ATPa_R1 | AGCGGAAAGTACAATACCCAGA |                          |

320 \* *Rpl32* primers from Ponton *et al.*, 2011.

321

322

323

324

325

326

327

328 **Additional references for Supplementary Tables 1-3**

329

330 Aardema, M. L. & Andolfatto, P. Phylogenetic incongruence and the evolutionary origins of  
331 cardenolide-resistant forms of Na<sup>+</sup>, K<sup>+</sup>-ATPase in *Danaus* butterflies. *Evolution* **70**, 1913-1921  
332 (2016).

333 Adams, M. D., *et al.* The genome sequence of *Drosophila melanogaster*. *Science* **287**, 2185-  
334 2195 (2000).

335 Ahola, V., *et al.* The Glanville fritillary genome retains an ancient karyotype and reveals  
336 selective chromosomal fusions in Lepidoptera. *Nat. Commun.* **5**, 4737 (2014).

337 Bramer, C., Dobler, S., Deckert, J., Stemmer, M. & Petschenka, G. Na<sup>+</sup>/K<sup>+</sup>-ATPase resistance  
338 and cardenolide sequestration: basal adaptations to host plant toxins in the milkweed bugs  
339 (Hemiptera: Lygaeidae: Lygaeinae). *Proc. R. Soc. B* **282**, 20142346 (2015).

340 Boevé, J. L., Blank, S. M., Meijer, G. & Nyman, T. Invertebrate and avian predators as drivers of  
341 chemical defensive strategies in tenthredinid sawflies. *BMC Evol. Biol.* **13**,198 (2013).

342 Bonasio, R., *et al.* Genomic comparison of the ants *Camponotus floridanus* and *Harpegnathos*  
343 *saltator*. *Science* **329**, 1068-1071 (2010).

344 Carvalho, A. B. & Clark, A. G. Efficient identification of Y chromosome sequences in the  
345 human and *Drosophila* genomes. *Genome Res.* **23**, 1894-1907 (2013).

346 Challis, R. J., Sujai Kumar, S., Dasmahapatra, K. K., Jiggins, C. D. & Blaxter, M. Lepbase: the  
347 Lepidopteran genome database. *bioRxiv* **doi**, 10.1101/056994 (2016).

348 Chen, W., *et al.* The draft genome of whitefly *Bemisia tabaci* MEAM1, a global crop pest,  
349 provides novel insights into virus transmission, host adaptation, and insecticide resistance. *BMC*  
350 *Biol.* **14**, 110 (2016).

351 Cong, Q., Borek, D., Otwinowski, Z. & Grishin, N. V. Skipper genome sheds light on unique  
352 phenotypic traits and phylogeny. *BMC Genomics*. **16**, 639 (2015).

353 Cong, Q., Shen, J., Borek, D., Robbins, R. K., Otwinowski, Z. & Grishin, N. V. Complete  
354 genomes of Hairstreak butterflies, their speciation, and nucleo-mitochondrial incongruence. *Sci.*  
355 *Rep.* **6**, 24863 (2016).

356 Cong, Q., Shen, J., Warren, A. D., Borek, D., Otwinowski, Z. & Grishin, N. V. Speciation in  
357 Cloudless Sulphurs gleaned from complete genomes. *Genome Biol. Evol.* **8**, 915-931 (2016).

358 DaCosta, M. A., Larson, P., Donahue, J. P. & Weller, S.J. Phylogeny of milkweed tussocks  
359 (Arctiidae: Arctiinae: Phaegopterini) and its implications for evolution of ultrasound  
360 communication. *Ann. Ent. Soc. Am.* **99**, 723-742 (2006).

361 Derks, M. F., *et al.* The genome of Winter Moth (*Operophtera brumata*) provides a genomic  
362 perspective on sexual dimorphism and phenology. *Genome Biol. Evol.* **7**, 2321-2332 (2015).

363 Drosophila 12 Genomes Consortium. Evolution of genes and genomes on the *Drosophila*  
364 phylogeny. *Nature* **450**, 203-218 (2007).

365 Espeland, M., *et al.* A comprehensive and dated phylogenomic analysis of butterflies. *Curr. Biol.*  
366 **28**, 770-778 (2018).

367 Fu, Y., *et al.* The genome of the Hi5 germ cell line from *Trichoplusia ni*, an agricultural pest and  
368 novel model for small RNA biology. *eLife* **7**, e31628 (2018).

369 Gómez-Zurita, J., Hunt, T., Kopliku, F. & Vogler, A.P. Recalibrated tree of leaf beetles  
370 (Chrysomelidae) indicates independent diversification of angiosperms and their insect  
371 herbivores. *PLoS ONE* **2**, e360 (2007).

372 Heikkilä, M., Kaila, L., Mutanen, M., Peña, C. & Wahlberg, N. Cretaceous origin and repeated  
373 tertiary diversification of the redefined butterflies. *Proc. R. Soc. B* **279**, 1093-1099 (2012).

374 Heliconius Genome Consortium. Butterfly genome reveals promiscuous exchange of mimicry  
375 adaptations among species. *Nature* **487**, 94-98 (2012).

376 Holt, R. A., *et al.* The genome sequence of the malaria mosquito *Anopheles gambiae*. *Science*  
377 **298**, 129-149 (2002).

378 Honeybee Genome Sequencing Consortium. Insights into social insects from the genome of the  
379 honeybee *Apis mellifera*. *Nature* **443**, 931-949 (2006).

380 Hunt, T., *et al.* A comprehensive phylogeny of beetles reveals the evolutionary origins of a  
381 superradiation. *Science* **318**, 1913-1916 (2007).

382 International Aphid Genomics Consortium. Genome sequence of the pea aphid *Acyrtosiphon*  
383 *pisum*. *PLoS Biol.* **8**, e1000313 (2010).

384 International Silkworm Genome Consortium. The genome of a lepidopteran model insect, the  
385 silkworm *Bombyx mori*. *Insect Biochem. Mol. Biol.* **38**, 1036-1045 (2008).

386 i5K Consortium. The i5K Initiative: Advancing arthropod genomics for knowledge, human  
387 health, agriculture, and the environment. *J. Hered.* **104**, 595-600 (2013).

388 Kakumani, P. K., Malhotra, P., Mukherjee, S. K. & Bhatnagar, R. K. A draft genome assembly  
389 of the army worm, *Spodoptera frugiperda*. *Genomics* **104**, 134-143 (2014).

390 Kawahara, A. Y. & Breinholt, J. W. Phylogenomics provides strong evidence for relationships of  
391 butterflies and moths. *Proc. R. Soc. B* **281**, 20140970 (2014).

392 Kearney, J. N. Selection and utilization of natural substrates as breeding sites by woodland  
393 *Drosophila* spp. *Entomol. Exp. Appl.* **33**, 63-70 (1983).

394 Keeling, C. I., *et al.* Draft genome of the mountain pine beetle, *Dendroctonus ponderosae*  
395 Hopkins, a major forest pest. *Genome Biol.* **14**, R27 (2013).



396 Kirkness, E. F., *et al.* Genome sequences of the human body louse and its primary endosymbiont  
397 provide insights into the permanent parasitic lifestyle. *Proc. Natl. Acad. Sci. U. S. A.* **107**,  
398 12168-12173 (2010).

399 Kunte, K. The diversity and evolution of Batesian mimicry in *Papilio* swallowtail butterflies.  
400 *Evolution* **63**, 2707-2716 (2009).

401 Li, H., *et al.* Higher-level phylogeny of paraneopteran insects inferred from mitochondrial  
402 genome sequences. *Sci. Rep.* **5**, 8527 (2015).

403 Li, X., *et al.* Outbred genome sequencing and CRISPR/Cas9 gene editing in butterflies. *Nat.*  
404 *Commun.* **6**, 8212 (2015).

405 Ma, W., Zhang, Z., Peng, C., Wang, X., Li, F. & Lin, Y. Exploring the midgut transcriptome and  
406 brush border membrane vesicle proteome of the rice stem borer, *Chilo suppressalis* (Walker).  
407 *PLoS ONE* **7**, e38151 (2012).

408 Mathers, T. C., *et al.* Rapid transcriptional plasticity of duplicated gene clusters enables a  
409 clonally reproducing aphid to colonise diverse plant species. *Genome Biol.* **18**, 27 (2017).

410 McKenna, D. D., *et al.* The beetle tree of life reveals that Coleoptera survived end-Permian mass  
411 extinction to diversify during the Cretaceous terrestrial revolution. *Syst. Entomol.* **40**, 835-880  
412 (2015).

413 McKenna, D. D., *et al.* Genome of the Asian longhorned beetle (*Anoplophora glabripennis*), a  
414 globally significant invasive species, reveals key functional and evolutionary innovations at the  
415 beetle-plant interface. *Genome Biol.* **17**, 227 (2016).

416 Meslin, C., *et al.* Structural complexity and molecular heterogeneity of a butterfly ejaculate  
417 reflect a complex history of selection. *Proc. Natl. Acad. Sci. U. S. A.* **114**, E5406-E5413 (2017).

418 Mitchell, A., Mitter, C. & Regier, J. C. Systematics and evolution of the cutworm moths  
419 (Lepidoptera: Noctuidae): evidence from two protein-coding nuclear genes. *Syst. Entomol.* **31**,  
420 21-46 (2006).

421 Moreira, N. R., Cardoso, C., Dias, R. O., Ferreira, C. & Terra W. R. A physiologically-oriented  
422 transcriptomic analysis of the midgut of *Tenebrio molitor*. *J. Insect Physiol.* **99**, 58-66 (2017).

423 Nene, V., *et al.* Genome sequence of *Aedes aegypti*, a major arbovirus vector. *Science* **316**,  
424 1718-1723 (2007).

425 Nishikawa, H., *et al.* A genetic mechanism for female-limited Batesian mimicry in *Papilio*  
426 butterfly. *Nat. Genet.* **47**, 405-409 (2015).

427 Nowell, R. W., *et al.* A high-coverage draft genome of the mycalesine butterfly *Bicyclus*  
428 *anymana*. *Gigascience* **6**, 1-7 (2017).

429 Ogawa, H., Shinoda, T., Cornelius, F. & Toyoshima, C. Crystal structure of the sodium-  
430 potassium pump (Na<sup>+</sup>,K<sup>+</sup>-ATPase) with bound potassium and ouabain. *Proc. Natl. Acad. Sci. U.*  
431 *S. A.* **106**, 13742-13747 (2009).

432 Pearce, S. L., *et al.* Genomic innovations, transcriptional plasticity and gene loss underlying the  
433 evolution and divergence of two highly polyphagous and invasive *Helicoverpa* pest species.  
434 *BMC Biol.* **15**, 63 (2017).

435 Pegueroles, C., Aquadro, C. F., Mestres, F. & Pascual, M. Gene flow and gene flux shape  
436 evolutionary patterns of variation in *Drosophila subobscura*. *Heredity* **110**, 520-529 (2013).

437 Peters, R. S., *et al.* Evolutionary history of the Hymenoptera. *Curr. Biol.* **27**, 1013-1018 (2017).

438 Peterson, B. K., *et al.* Big genomes facilitate the comparative identification of regulatory  
439 elements. *PLoS ONE* **4**, e4688 (2009).

440 Petschenka, G., Offe, J. K. & Dobler, S. Physiological screening for target site insensitivity and  
441 localization of Na<sup>+</sup>/K<sup>+</sup>-ATPase in cardenolide-adapted Lepidoptera. *J. Insect Phys.* **58**, 607-612  
442 (2012).

443 Pierce, A. A., de Roode, J. C. & Tao, L. Comparative genetics of Na<sup>+</sup>/K<sup>+</sup>-ATPase in monarch  
444 butterfly populations with varying host plant toxicity. *Biol. J. Linn. Soc.* **119**, 194-200 (2016).

445 Ragland, G. J., *et al.* Differences in performance and transcriptome-wide gene expression  
446 associated with *Rhagoletis* (Diptera: Tephritidae) larvae feeding in alternate host fruit  
447 environments. *Mol. Ecol.* **24**, 2759-2776 (2015).

448 Rainford, J. L., Hofreiter, M., Nicholson, D. B. & Mayhew, P.J. Phylogenetic distribution of  
449 extant richness suggests metamorphosis is a key innovation driving diversification in insects.  
450 *PLoS ONE* **9**, e109085 (2014).

451 Reeves, S. A. & Yamanaka, M. K. Cloning and sequence analysis of the alpha subunit of the cat  
452 flea sodium pump. *Insect Biochem. Mol. Biol.* **23**, 809-814 (1993).

453 Richards, S., *et al.* Comparative genome sequencing of *Drosophila pseudoobscura*:  
454 chromosomal, gene, and *cis*-element evolution. *Genome Res.* **15**, 1-18 (2005).

455 San Jose, M., Doorenweerd, C., Leblanc, L., Barr, N., Geib, S. & Rubinoff, D. Incongruence  
456 between molecules and morphology: a seven-gene phylogeny of Dacini fruit flies paves the way  
457 for reclassification (Diptera: Tephritidae). *Mol. Phylogenet. Evol.* **121**, 139-149 (2017).

458 Schoville, S. D., *et al.* A model species for agricultural pest genomics: the genome of the  
459 Colorado potato beetle, *Leptinotarsa decemlineata* (Coleoptera: Chrysomelidae). *Sci. Rep.* **8**,  
460 1931 (2018).

461 Seetharam, A. S. & Stuart, G. W. Whole genome phylogeny for 21 *Drosophila* species using  
462 predicted 2b-RAD fragments. *PeerJ.* **1**, e226 (2013).

463 Shen, J., Cong, Q., Kinch, L. N., Borek, D., Otwinowski, Z. & Grishin, N. V. Complete genome  
464 of *Pieris rapae*, a resilient alien, a cabbage pest, and a source of anti-cancer proteins. *F1000Res.*  
465 **5**, 2631 (2016).

466 Sim, S. B. & Geib, S. M. A chromosome-scale assembly of the *Bactrocera cucurbitae* genome  
467 provides insight to the genetic basis of *white pupae*. *G3* **7**, 1927-1940 (2017).

468 Thorpe, P., Cock, P. J. & Bos, J. Comparative transcriptomics and proteomics of three different  
469 aphid species identifies core and diverse effector sets. *BMC Genomics* **17**, 172 (2016).

470 Van Belleghem, S. M., *et al.* Complex modular architecture around a simple toolkit of wing  
471 pattern genes. *Nat. Ecol. Evol.* **1**, 52 (2017).

472 Virgilio, M., Jordaens, K., Verwimp, C., White, I. M. & De Meyer, M. Higher phylogeny of  
473 frugivorous flies (Diptera, Tephritidae, Dacini): localised partition conflicts and a novel generic  
474 classification. *Mol. Phylogenet. Evol.* **85**, 171-179 (2015).

475 Wiegmann, B.M., *et al.* Episodic radiations in the fly tree of life. *Proc. Natl. Acad. Sci. U. S. A.*  
476 **108**, 5690-5695 (2011).

477 Wiens, J. J., Lapoint, R. T. & Whiteman, N. K. Herbivory increases diversification across insect  
478 clades. *Nat. Commun.* **6**, 8370 (2015).

479 Xue, J., *et al.* Genomes of the rice pest brown planthopper and its endosymbionts reveal complex  
480 complementary contributions for host adaptation. *Genome Biol.* **15**, 521 (2014).

481 Yatime, L., Laursen, M., Morth, J. P., Esmann, M., Nissen, P. & Fedosova, N. U. Structural  
482 insights into the high affinity binding of cardiotonic steroids to the Na<sup>+</sup>,K<sup>+</sup>-ATPase. *J. Struct.*  
483 *Biol.* **174**, 296-306 (2011).

484 You, M., *et al.* A heterozygous moth genome provides insights into herbivory and detoxification.  
485 *Nat. Genet.* **45**, 220-225 (2013).

486 Zahiri, R., *et al.* A new molecular phylogeny offers hope for a stable family level classification  
487 of the Noctuoidea (Lepidoptera). *Zool. Script.* **40**, 158-173 (2011).

488 Zaspel, J. M., Weller, S. J., Wardwell, C. T., Zahiri, R. & Wahlberg, N. Phylogeny and evolution  
489 of pharmacophagy in tiger moths (Lepidoptera: Erebidae: Arctiinae). *PLoS ONE* **9**, e101975  
490 (2014).

491 Zhang, L., Mazo-Vargas, A. & Reed R. D. Single master regulatory gene coordinates the  
492 evolution and development of butterfly color and iridescence. *Proc. Natl. Acad. Sci. U. S. A.*  
493 **114**, 10707-10712 (2017).

494 Zheng, W., Luo, D., Wu, F., Wang, J. & Zhang, H. RNA sequencing to characterize  
495 transcriptional changes of sexual maturation and mating in the female oriental fruit fly  
496 *Bactrocera dorsalis*. *BMC Genomics* **17**, 194 (2016).
